# Supplementary material
Source: PubMed Central journal article supplement (PMC3070186)
Supplement: NIHMS266116-supplement-1_si_001.pdf [file NIHMS266116-supplement-1_si_001.pdf]

**Methemoglobinemia Caused by 8-Aminoquinoline  
Drugs: DFT Calculations Suggest an Analogy to H<sub>4</sub>B's  
Role in Nitric Oxide Synthase**

Haining Liu<sup>1</sup>, Larry A. Walker<sup>2,3</sup>, N. P. Dhammika Nanayakara<sup>3</sup>, and Robert J. Doerksen<sup>1,3\*</sup>

*Departments of<sup>1</sup>Medicinal Chemistry and<sup>2</sup>Pharmacology, and the<sup>3</sup>National Center for Natural  
Products Research*

*School of Pharmacy, University of Mississippi, University, MS 38677*

**Supporting Information**

### **Detailed docking procedure and top 10 binding poses generated by the Glide SP method.**

Docking calculations were performed using the Glide software. The crystal structure (PDB: 2D5X) of carbonmonoxy hemoglobin complexed with the ligand 2-[4-(3,5-dichlorophenylureido)phenoxy]-2-methylpropionic acid (L35) was used. For this tetrameric protein, only the monomer (including heme) with L35 hydrogen bonded with the propionate group of heme was kept for docking, while all the other chains, ligands and water molecules were removed. The location of L35 was defined as the active site for Glide. The extra precision (XP) module of Glide was used and the obtained most preferred binding pose (as ranked by Glide score) was selected to build the chemical model for DFT calculations.

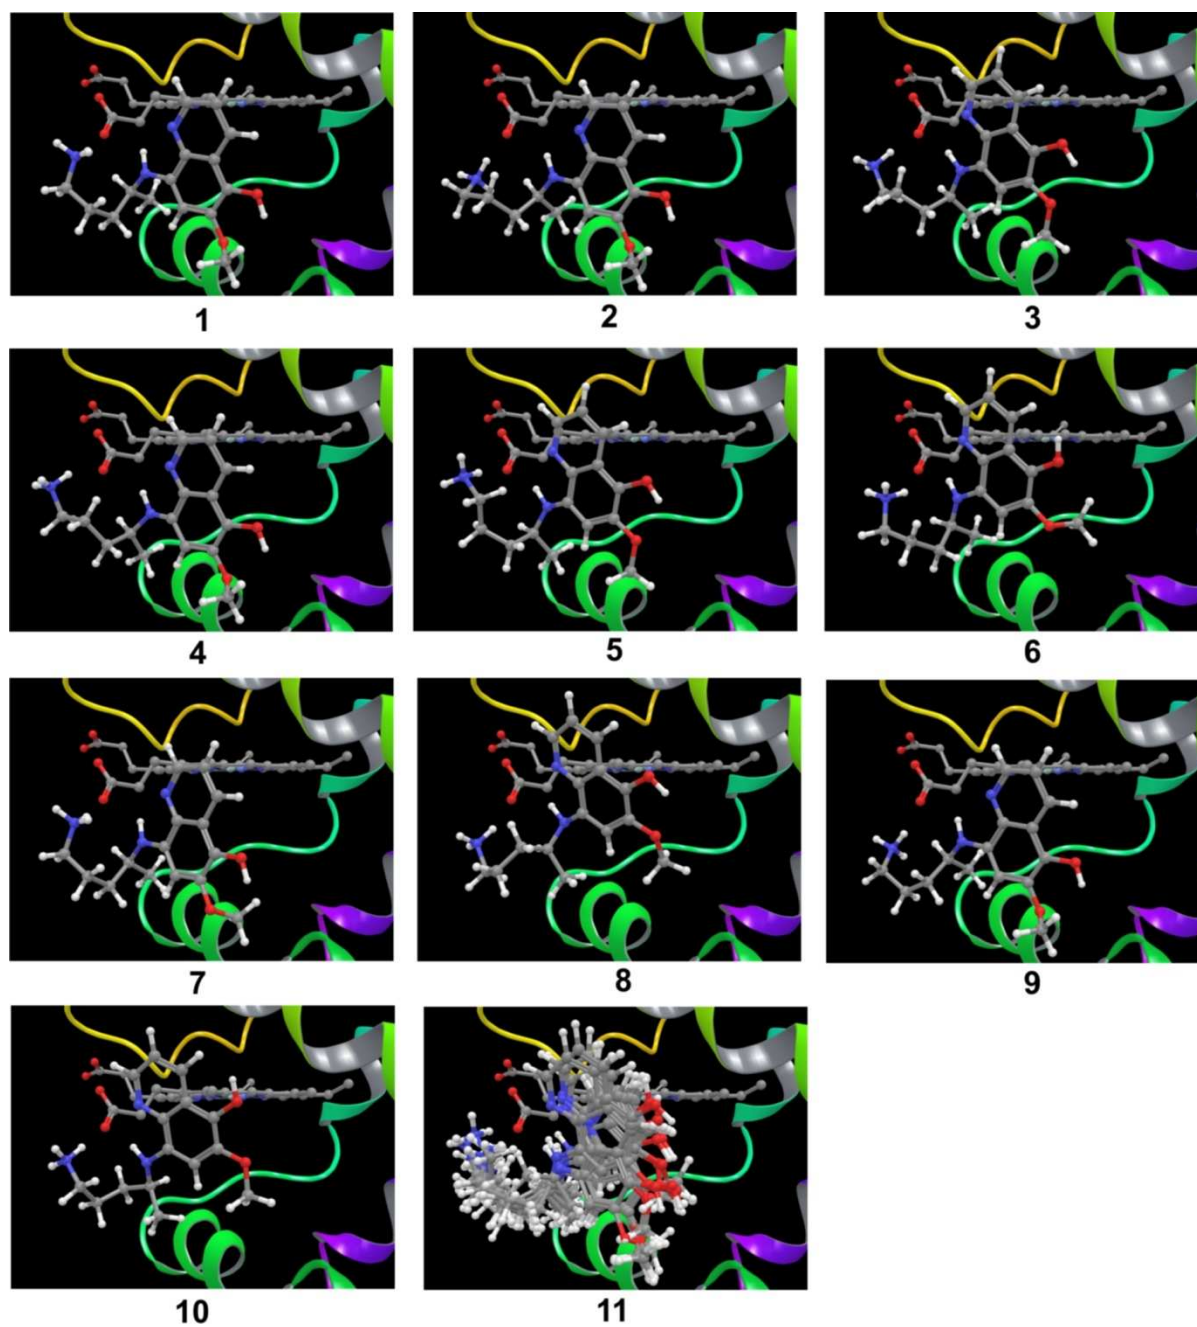

**Figure S1.** The top ten (1–10) binding poses generated by the Glide SP method and a superimposition (11) of the ten binding poses.

### The effect of proton transfer between the $-\text{NH}_3^+$ of 5-HPQ and $-\text{COO}^-$ of heme on the calculated spin densities.

In the gas phase calculations, the  $-\text{NH}_3^+$  of 5-HPQ automatically transfers a proton to the  $-\text{COO}^-$  of heme during geometry optimizations, yielding  $-\text{NH}_2$  and  $-\text{COOH}$ . Hence, this is predicted to be a spontaneous process in the gas phase. The polar environment of the solution phase may be able to stabilize the electrostatic interaction of  $-\text{NH}_3^+\cdots^-\text{OOC}-$ . To investigate the effects of proton transfer, we fixed two of the N–H bonds at 1.0 Å to prevent proton transfer. The geometries of the unprotonated species in the singlet spin state, the singly protonated species in the triplet spin state and the doubly protonated complexes in the triplet spin state were re-optimized and single point calculations were performed with a dielectric constant of 4. The resulting unprotonated, singly protonated and doubly protonated complexes are 34.7, 23.8 and 19.0 kJ mol<sup>-1</sup> higher in energy, respectively, than their counterparts without the N–H bond fixed. The calculated spin densities are listed below.

**Table S1.** Calculated spin densities of the unprotonated complex ( $\text{O}_2$ ) in the singlet spin state, the singly protonated complex ( $\text{OOH}$ ) in the triplet spin state and the doubly protonated complexes ( $\text{HOOH}$ ) in the triplet spin state with two of the N–H bonds fixed at 1.0 Å.

| Structure     | M | Spin Density |                    |                    |       |       |
|---------------|---|--------------|--------------------|--------------------|-------|-------|
|               |   | Fe           | O <sub>inner</sub> | O <sub>outer</sub> | heme  | 5-HPQ |
| $\text{O}_2$  | 1 | 1.52         | -0.66              | -0.78              | -0.09 | 0.00  |
| $\text{OOH}$  | 3 | 0.82         | 0.21               | 0.03               | 0.40  | 0.55  |
| $\text{HOOH}$ | 3 | 1.06         | -0.01              | 0.00               | -0.04 | 1.01  |

As can be seen, the calculated spin densities showed that the 5-HPQ donates 0, ~0.6 and ~1.0 electrons to  $\text{O}_2$  in the unprotonated, singly protonated and doubly protonated complexes, respectively, which is similar to the results in Table 1. Thus, even for the system containing the  $-\text{NH}_3^+\cdots^-\text{OOC}-$  interaction, our conclusions do not change.

### The effect of a more polar environment on the calculated spin densities.

We performed single point calculations on the unprotonated species in the singlet spin state, the singly protonated species in the triplet spin state and the doubly protonated complexes in the triplet spin state with a dielectric constant of 80.37, in order to consider the maximum effect that could occur from the binding site being exposed to solvent. The calculated spin densities are listed below.

**Table S2.** Calculated spin densities of the unprotonated complex ( $O_2$ ) in the singlet spin state, the singly protonated complex (OOH) in the triplet spin state and the doubly protonated complexes (HOOH) in the triplet spin state with a dielectric constant of 80.37.

| Structure      | M | Spin Density |                    |                    |       |       |
|----------------|---|--------------|--------------------|--------------------|-------|-------|
|                |   | Fe           | O <sub>inner</sub> | O <sub>outer</sub> | heme  | 5-HPQ |
| O <sub>2</sub> | 1 | 1.31         | -0.54              | -0.70              | -0.08 | 0.00  |
| OOH            | 3 | 0.88         | 0.17               | 0.02               | 0.20  | 0.75  |
| HOOH           | 3 | 1.06         | 0.00               | 0.00               | -0.04 | 1.01  |

Upon increasing the polarity of the environment, electron transfers from 5-HPQ to  $O_2$  were again observed in the singly and doubly protonated complexes. A more polar environment has the effect of making 5-HPQ donate more electron density in the singly protonated complex. This is perhaps because of stabilization of the 5-HPQ radical cation in the more polar environment. Nevertheless, the conclusion that 5-HPQ is able to donate an electron to facilitate the conversion of  $O_2$  to  $H_2O_2$  does not change with inclusion of the solvent effects.

It should be noted that neither fixing of the N–H bond lengths nor increasing the polarity of the environment had a significant effect on the spin distribution in the doubly protonated complex. In addition to one electron from iron, the second electron required to convert  $O_2$  to  $H_2O_2$  purely comes from 5-HPQ, thus resulting in essentially the same spin distribution in the three cases shown in Table 1, Table S1 and Table S2.

**Optimized xyz coordinates (in Å) of all structures considered in this study.**

O2 complex

Singlet

|     |               |               |               |
|-----|---------------|---------------|---------------|
| C1  | 21.7809475983 | 51.7651452776 | 29.1611303267 |
| N2  | 23.0893791053 | 51.3276730686 | 29.2658998887 |
| C3  | 21.1382297584 | 50.8175092227 | 28.4122764879 |
| C4  | 23.1917954179 | 50.1547474807 | 28.5908030761 |
| N5  | 22.0290227314 | 49.8226149539 | 28.0652528783 |
| Fe6 | 21.6460405298 | 48.0216824223 | 26.8976332899 |
| C7  | 22.6184599127 | 49.7039760454 | 24.0944834417 |
| C8  | 24.8716599931 | 46.8971507469 | 27.3247864416 |
| C9  | 20.7298879386 | 46.4780195028 | 29.8022261079 |
| C10 | 18.4081850072 | 49.0152099805 | 26.3928596554 |
| N11 | 23.4046076724 | 48.2730840565 | 25.9179165153 |
| C12 | 23.6052855690 | 48.9977919907 | 24.7690183727 |
| C13 | 24.9954147077 | 48.8979937109 | 24.3365513115 |
| C14 | 25.6059953310 | 48.0866882543 | 25.2486839589 |
| C15 | 24.6143177009 | 47.7063280483 | 26.2240575877 |
| C16 | 25.5864407627 | 49.5692381708 | 23.1264054436 |
| C17 | 26.9461128803 | 48.9926564352 | 22.7185958157 |
| C18 | 27.5966849031 | 49.7458072609 | 21.5740765659 |
| O19 | 28.5253226232 | 49.0149508788 | 20.9541110893 |
| O20 | 27.3242011956 | 50.8994032941 | 21.2674886662 |
| N21 | 22.6180527269 | 46.9223011090 | 28.2947248866 |
| C22 | 23.9354949506 | 46.5403979795 | 28.2909892543 |
| C23 | 24.2221251462 | 45.7313618246 | 29.4513880090 |
| C24 | 23.0614374676 | 45.6320354972 | 30.1563328232 |
| C25 | 22.0621516411 | 46.3714369427 | 29.4221573469 |
| N26 | 19.9122388128 | 47.8008569591 | 27.9028062772 |
| C27 | 19.7330877943 | 47.1302596856 | 29.0846317814 |
| C28 | 18.3433606568 | 47.1743369309 | 29.4737932106 |
| C29 | 17.6854352713 | 47.8696852612 | 28.5052640531 |
| C30 | 18.6741748063 | 48.2583799444 | 27.5290360347 |
| N31 | 20.7003649591 | 49.1488726464 | 25.5293843164 |
| C32 | 19.3575454686 | 49.4289333810 | 25.4668327837 |
| C33 | 19.0751810200 | 50.2442692934 | 24.3108034540 |
| C34 | 20.2632328750 | 50.4527379855 | 23.6792586957 |
| C35 | 21.2717292696 | 49.7575778047 | 24.4443527997 |
| H36 | 23.8371603031 | 51.7941076982 | 29.7578617584 |
| H37 | 20.1070986211 | 50.7756736409 | 28.0977816224 |
| H38 | 24.1029311917 | 49.5818333643 | 28.5049046652 |
| H39 | 22.9098174564 | 50.2409169678 | 23.1974981522 |
| H40 | 25.8825927474 | 46.5153601613 | 27.4345231737 |
| H41 | 20.4359520329 | 45.9856053660 | 30.7249941149 |
| H42 | 17.3779230884 | 49.3115559565 | 26.2194182210 |

|     |               |               |               |
|-----|---------------|---------------|---------------|
| H43 | 24.8954349233 | 49.4831141093 | 22.2773738262 |
| H44 | 25.6982201115 | 50.6482706928 | 23.2989074005 |
| H45 | 27.6520266604 | 49.0310443168 | 23.5601285121 |
| H46 | 26.8674613019 | 47.9344560251 | 22.4476340786 |
| C47 | 29.7838930817 | 46.9865624639 | 25.3188466062 |
| C48 | 30.3045498839 | 48.2570110751 | 25.1348300687 |
| C49 | 31.0798676935 | 48.5856901023 | 23.9999242889 |
| C50 | 31.3370157140 | 47.6352959920 | 23.0156509111 |
| H51 | 31.4804128942 | 49.5863461073 | 23.8973060065 |
| C52 | 30.0450246889 | 45.9863674684 | 24.3557545585 |
| C53 | 30.8199494961 | 46.3043682892 | 23.1960302035 |
| N54 | 31.0807460973 | 45.3925608210 | 22.2220866539 |
| C55 | 30.6157013429 | 44.1665757074 | 22.3632116428 |
| C56 | 29.8518737407 | 43.7468366368 | 23.4786717583 |
| C57 | 29.5639685357 | 44.6561707021 | 24.4695227935 |
| H58 | 30.8433709354 | 43.4644625760 | 21.5616159763 |
| H59 | 29.4978599974 | 42.7215509039 | 23.5379391190 |
| H60 | 28.9752538571 | 44.3795153557 | 25.3383899946 |
| N61 | 32.0718245973 | 47.8797322600 | 21.8732075891 |
| H62 | 32.0425181054 | 47.0795628561 | 21.2485043616 |
| O63 | 29.9916022376 | 49.1408175942 | 26.1460468259 |
| C64 | 30.5355605796 | 50.4497045484 | 26.1024795396 |
| H65 | 30.1848118751 | 50.9520300173 | 27.0065227360 |
| H66 | 31.6331994484 | 50.4285299854 | 26.1016844754 |
| H67 | 30.1833497538 | 51.0026858898 | 25.2220833441 |
| C68 | 32.1536142427 | 49.1940733919 | 21.2357891593 |
| C69 | 31.9363289685 | 49.0083567210 | 19.7195192210 |
| H70 | 32.7285423544 | 48.3482378756 | 19.3363579399 |
| H71 | 30.9897418853 | 48.4731488822 | 19.5803811345 |
| C72 | 31.9283481190 | 50.2932665744 | 18.8729140713 |
| H73 | 32.9084016748 | 50.7849890527 | 18.9183291974 |
| H74 | 31.7875587408 | 50.0094224253 | 17.8195458978 |
| C75 | 30.8610904975 | 51.3305845396 | 19.2492445201 |
| H76 | 31.0031414150 | 52.2279109704 | 18.6265758633 |
| H77 | 30.9904226657 | 51.6490271593 | 20.2899501861 |
| H78 | 28.8030440773 | 51.4438534558 | 19.4894951207 |
| H79 | 29.2664770289 | 50.6024364789 | 18.1541174735 |
| N80 | 29.4966552383 | 50.7855749107 | 19.1305238994 |
| O81 | 29.0102220101 | 46.6841450975 | 26.4179509862 |
| H82 | 29.0037154645 | 47.4836457623 | 26.9721806500 |
| H83 | 28.9471900426 | 49.5871302222 | 20.2275241943 |
| C84 | 33.4870684152 | 49.8831097944 | 21.5689204733 |
| H85 | 33.5261558981 | 50.9085340972 | 21.1816220283 |
| H86 | 33.6381048263 | 49.9253141989 | 22.6528673418 |
| H87 | 34.3254202625 | 49.3200487545 | 21.1411719122 |
| H88 | 31.3287654937 | 49.8057317203 | 21.6280189009 |

|     |               |               |               |
|-----|---------------|---------------|---------------|
| H89 | 26.6356601792 | 47.7534423935 | 25.2785993909 |
| H90 | 20.4552738556 | 51.0132501205 | 22.7729974732 |
| H91 | 18.0917428068 | 50.6019792383 | 24.0329913151 |
| H92 | 16.6306651378 | 48.1063539764 | 28.4437848715 |
| H93 | 17.9382782739 | 46.7183496396 | 30.3689402250 |
| H94 | 22.8788291296 | 45.1006432625 | 31.0824771084 |
| H95 | 25.1890038203 | 45.3012052951 | 29.6802461079 |
| H96 | 21.4439349649 | 52.6831189309 | 29.6172737462 |
| O97 | 21.3706126363 | 46.4190031828 | 25.8911474035 |
| O98 | 20.2162374231 | 46.2166277290 | 25.4045135506 |

## O2 complex

### Triplet

|     |               |               |               |
|-----|---------------|---------------|---------------|
| C1  | 21.4692935316 | 51.7663817350 | 29.0675809043 |
| N2  | 22.7953763562 | 51.4149684694 | 29.2488578909 |
| C3  | 20.9254055627 | 50.7647495551 | 28.3116217351 |
| C4  | 23.0069096930 | 50.2377279075 | 28.6104719389 |
| N5  | 21.8944318481 | 49.8220572326 | 28.0360589051 |
| Fe6 | 21.6987584580 | 48.0235438286 | 26.9142596105 |
| C7  | 22.6688973360 | 49.7702852994 | 24.1530701158 |
| C8  | 24.9597961720 | 47.0904156846 | 27.4634554973 |
| C9  | 20.7681898497 | 46.4816203003 | 29.8143148894 |
| C10 | 18.4192135837 | 48.7696058845 | 26.2541348610 |
| N11 | 23.4681557862 | 48.3867993172 | 26.0063391252 |
| C12 | 23.6706522609 | 49.1261298021 | 24.8664005789 |
| C13 | 25.0791462350 | 49.1047685398 | 24.4865557794 |
| C14 | 25.6976137627 | 48.3194534741 | 25.4167989503 |
| C15 | 24.6951457276 | 47.8826749889 | 26.3529269595 |
| C16 | 25.6903566125 | 49.8175653879 | 23.3105009987 |
| C17 | 26.9622275399 | 49.1384872852 | 22.7866449881 |
| C18 | 27.6463786311 | 49.9307938219 | 21.6878182412 |
| O19 | 28.4538300824 | 49.1709086850 | 20.9451189710 |
| O20 | 27.4976756990 | 51.1331019606 | 21.5124808669 |
| N21 | 22.6775352451 | 47.0118711070 | 28.3604504025 |
| C22 | 24.0132370807 | 46.6967500110 | 28.4029237504 |
| C23 | 24.3047592870 | 45.9233608950 | 29.5846349243 |
| C24 | 23.1294950193 | 45.7785134214 | 30.2575271074 |
| C25 | 22.1161289319 | 46.4502715165 | 29.4802217053 |
| N26 | 19.9410143383 | 47.6978760174 | 27.8511110209 |
| C27 | 19.7594931665 | 47.0454092880 | 29.0418277216 |
| C28 | 18.3547144243 | 46.9963610959 | 29.3725699752 |
| C29 | 17.6909571172 | 47.6155130623 | 28.3579801392 |
| C30 | 18.6906751661 | 48.0531831488 | 27.4139572279 |
| N31 | 20.7333864183 | 49.0705355512 | 25.4977661761 |
| C32 | 19.3778983806 | 49.2455085020 | 25.3689394167 |
| C33 | 19.0895689017 | 50.0356411882 | 24.1971516548 |



|     |               |               |               |
|-----|---------------|---------------|---------------|
| C34 | 20.2874267321 | 50.3383373683 | 23.6250902389 |
| C35 | 21.3079118764 | 49.7228764315 | 24.4404042182 |
| H36 | 23.4869944446 | 51.9389204213 | 29.7646547925 |
| H37 | 19.9170519468 | 50.6509177002 | 27.9465047009 |
| H38 | 23.9548930305 | 49.7221982608 | 28.5835254244 |
| H39 | 22.9592964846 | 50.3304363022 | 23.2705705784 |
| H40 | 25.9847264847 | 46.7607970534 | 27.6060771732 |
| H41 | 20.4734158563 | 45.9912705702 | 30.7377549251 |
| H42 | 17.3785637492 | 48.9851902939 | 26.0295841413 |
| H43 | 24.9637200044 | 49.8867154162 | 22.4917372242 |
| H44 | 25.9311395962 | 50.8569294928 | 23.5721801226 |
| H45 | 27.7002471955 | 49.0154741250 | 23.5913451768 |
| H46 | 26.7535805341 | 48.1280456084 | 22.4198259611 |
| C47 | 29.8331199792 | 47.0722030066 | 25.4113476566 |
| C48 | 30.4322364753 | 48.2964680150 | 25.1640923522 |
| C49 | 31.1217282307 | 48.5575216478 | 23.9580708551 |
| C50 | 31.2134866321 | 47.5830917953 | 22.9673510644 |
| H51 | 31.5860375222 | 49.5236808412 | 23.8072456366 |
| C52 | 29.9232101274 | 46.0495293267 | 24.4401711372 |
| C53 | 30.6082055474 | 46.2992943364 | 23.2095552933 |
| N54 | 30.6995546377 | 45.3669442850 | 22.2246742058 |
| C55 | 30.1528505844 | 44.1830695117 | 22.4225727960 |
| C56 | 29.4704687304 | 43.8292316881 | 23.6111193809 |
| C57 | 29.3522801834 | 44.7621994586 | 24.6147355074 |
| H58 | 30.2436987254 | 43.4631218594 | 21.6097289019 |
| H59 | 29.0434316037 | 42.8359181135 | 23.7156350818 |
| H60 | 28.8295069084 | 44.5366532112 | 25.5387708200 |
| N61 | 31.8567354835 | 47.7595125113 | 21.7614787810 |
| H62 | 31.6938829463 | 46.9740976749 | 21.1394354810 |
| O63 | 30.2899239215 | 49.2057762173 | 26.1910039650 |
| C64 | 30.8742021640 | 50.4903218463 | 26.0520641647 |
| H65 | 30.6439321673 | 51.0275669634 | 26.9745330149 |
| H66 | 31.9636667093 | 50.4254830257 | 25.9332767823 |
| H67 | 30.4485946166 | 51.0352026472 | 25.1994650450 |
| C68 | 32.0625208307 | 49.0648609906 | 21.1396535578 |
| C69 | 31.7825565736 | 48.9322525722 | 19.6292048039 |
| H70 | 32.4928662182 | 48.2060503987 | 19.2073080112 |
| H71 | 30.7834204874 | 48.4972990162 | 19.5107106255 |
| C72 | 31.8771485986 | 50.2333075059 | 18.8128022736 |
| H73 | 32.9058175972 | 50.6156878951 | 18.8243432492 |
| H74 | 31.6590815008 | 49.9975523052 | 17.7609306044 |
| C75 | 30.9481176954 | 51.3685482792 | 19.2659162193 |
| H76 | 31.1566519287 | 52.2629460610 | 18.6579495531 |
| H77 | 31.1624796887 | 51.6415522386 | 20.3052209130 |
| H78 | 28.9319449233 | 51.6881693711 | 19.6339732580 |
| H79 | 29.2253941096 | 50.8736661741 | 18.2367373831 |

|     |               |               |               |
|-----|---------------|---------------|---------------|
| N80 | 29.5273652070 | 50.9781545394 | 19.2050747663 |
| O81 | 29.1456226342 | 46.8377286705 | 26.5819193129 |
| H82 | 29.2570795104 | 47.6368728725 | 27.1252764185 |
| H83 | 28.9017783668 | 49.7645092171 | 20.2531796969 |
| C84 | 33.4731048660 | 49.5992462173 | 21.4395213515 |
| H85 | 33.6104112312 | 50.6228016088 | 21.0702647647 |
| H86 | 33.6637261734 | 49.6012240419 | 22.5178818961 |
| H87 | 34.2305321813 | 48.9584048348 | 20.9723076398 |
| H88 | 31.3212842891 | 49.7572287178 | 21.5648275624 |
| H89 | 26.7414139439 | 48.0391371689 | 25.4822953240 |
| H90 | 20.4798706094 | 50.9132239336 | 22.7279893807 |
| H91 | 18.0957341157 | 50.3154573111 | 23.8701521746 |
| H92 | 16.6255088945 | 47.7720922191 | 28.2454778447 |
| H93 | 17.9461393513 | 46.5338595195 | 30.2626979828 |
| H94 | 22.9458057835 | 45.2540956325 | 31.1874400691 |
| H95 | 25.2850067480 | 45.5467618044 | 29.8496338308 |
| H96 | 21.0526057225 | 52.6709154891 | 29.4826634962 |
| O97 | 21.6169663723 | 46.4018295276 | 25.9225083524 |
| O98 | 20.4560892957 | 46.1218618085 | 25.4257555703 |

#### O2 complex

##### Quintet

|     |               |               |               |
|-----|---------------|---------------|---------------|
| C1  | 21.5858319182 | 51.9634872133 | 29.4930177316 |
| N2  | 22.9265264020 | 51.6291020406 | 29.5555156973 |
| C3  | 21.0104796750 | 51.0084052801 | 28.6977665928 |
| C4  | 23.1057844284 | 50.5053097352 | 28.8097311764 |
| N5  | 21.9678470514 | 50.1077508743 | 28.2800259286 |
| Fe6 | 21.7489595548 | 48.1789713239 | 26.9593783656 |
| C7  | 22.6553721457 | 49.7696739907 | 24.0753708817 |
| C8  | 24.9599310997 | 47.0286796643 | 27.3300980029 |
| C9  | 20.8137131883 | 46.4647894308 | 29.7709790897 |
| C10 | 18.4672116286 | 49.0177790665 | 26.3917495596 |
| N11 | 23.4686956804 | 48.3938019770 | 25.9337243733 |
| C12 | 23.6543481757 | 49.0952941064 | 24.7633150955 |
| C13 | 25.0394339537 | 48.9911999598 | 24.3169370024 |
| C14 | 25.6662759606 | 48.2058149481 | 25.2400448451 |
| C15 | 24.6891069415 | 47.8393884136 | 26.2348397872 |
| C16 | 25.6099890747 | 49.6196642888 | 23.0750672951 |
| C17 | 26.9801869684 | 49.0532939178 | 22.6916518624 |
| C18 | 27.5958974352 | 49.7325537921 | 21.4842345405 |
| O19 | 28.5556970367 | 48.9911664720 | 20.9263409105 |
| O20 | 27.2741210262 | 50.8424890549 | 21.0799852351 |
| N21 | 22.7040880657 | 46.9982573525 | 28.2936276414 |
| C22 | 24.0304165181 | 46.6392093913 | 28.2899332977 |
| C23 | 24.3248058096 | 45.8007961653 | 29.4260284519 |
| C24 | 23.1598093148 | 45.6559425273 | 30.1180009160 |

|     |               |               |               |
|-----|---------------|---------------|---------------|
| C25 | 22.1519988186 | 46.3996733914 | 29.4022063999 |
| N26 | 19.9871827139 | 47.8136091482 | 27.8961277874 |
| C27 | 19.8074059736 | 47.1116807664 | 29.0602874293 |
| C28 | 18.4125730851 | 47.1144446210 | 29.4358491783 |
| C29 | 17.7497358033 | 47.8217005366 | 28.4796984698 |
| C30 | 18.7412613435 | 48.2539900309 | 27.5227214587 |
| N31 | 20.7553672018 | 49.1961713357 | 25.5210742235 |
| C32 | 19.4058326077 | 49.4540329005 | 25.4634954693 |
| C33 | 19.1007141117 | 50.2521521538 | 24.3008335579 |
| C34 | 20.2814919038 | 50.4726636653 | 23.6579217078 |
| C35 | 21.3065493969 | 49.8054872330 | 24.4256917522 |
| H36 | 23.6420227182 | 52.1248444759 | 30.0664619595 |
| H37 | 19.9788426380 | 50.9005831345 | 28.3974995441 |
| H38 | 24.0603528377 | 50.0148118640 | 28.6829255457 |
| H39 | 22.9371510136 | 50.2903871169 | 23.1650820447 |
| H40 | 25.9739977123 | 46.6518479134 | 27.4285462950 |
| H41 | 20.5230464659 | 45.9393901898 | 30.6767008784 |
| H42 | 17.4312830706 | 49.2956584788 | 26.2193690443 |
| H43 | 24.9185383563 | 49.4757653650 | 22.2345553060 |
| H44 | 25.6956513663 | 50.7081657191 | 23.1941299178 |
| H45 | 27.6946035843 | 49.1717658804 | 23.5182998036 |
| H46 | 26.9287503621 | 47.9758483475 | 22.5012662226 |
| C47 | 29.7015541518 | 46.7798206015 | 25.2420688972 |
| C48 | 30.1420872970 | 48.0843924764 | 25.0935098939 |
| C49 | 30.9386358082 | 48.4821523602 | 23.9966993976 |
| C50 | 31.2979367636 | 47.5661981512 | 23.0123670811 |
| H51 | 31.2743564567 | 49.5090799899 | 23.9228379770 |
| C52 | 30.0655485203 | 45.8140339690 | 24.2772306688 |
| C53 | 30.8638399899 | 46.2011068340 | 23.1545648593 |
| N54 | 31.2264931692 | 45.3228175020 | 22.1822039413 |
| C55 | 30.8390016874 | 44.0667753039 | 22.2880673707 |
| C56 | 30.0587379996 | 43.5802175348 | 23.3642921758 |
| C57 | 29.6700359911 | 44.4533072332 | 24.3535113449 |
| H58 | 31.1477918022 | 43.3933162600 | 21.4889350925 |
| H59 | 29.7720308856 | 42.5328562409 | 23.3953268453 |
| H60 | 29.0656232719 | 44.1254040531 | 25.1933091009 |
| N61 | 32.0664308432 | 47.8740574642 | 21.9081817672 |
| H62 | 32.1212592503 | 47.0787580226 | 21.2787818689 |
| O63 | 29.7231261876 | 48.9314475184 | 26.0981125865 |
| C64 | 30.2359021649 | 50.2533426866 | 26.1360242833 |
| H65 | 29.8188294758 | 50.7124000928 | 27.0347682343 |
| H66 | 31.3318661041 | 50.2565147677 | 26.1997587978 |
| H67 | 29.9223354131 | 50.8320512557 | 25.2577434637 |
| C68 | 32.0870681133 | 49.1955783877 | 21.2788884179 |
| C69 | 31.9635423335 | 48.9993623136 | 19.7534973320 |
| H70 | 32.8057324906 | 48.3746481939 | 19.4204889685 |

|     |               |               |               |
|-----|---------------|---------------|---------------|
| H71 | 31.0520460827 | 48.4206810531 | 19.5629885049 |
| C72 | 31.9501094588 | 50.2781648927 | 18.8981003383 |
| H73 | 32.9028861324 | 50.8131007773 | 18.9998410139 |
| H74 | 31.8881351083 | 49.9817614686 | 17.8405187410 |
| C75 | 30.8176625791 | 51.2712807600 | 19.1947136127 |
| H76 | 30.9566489892 | 52.1653714330 | 18.5667406167 |
| H77 | 30.8708213428 | 51.6090940537 | 20.2362277509 |
| H78 | 28.7450906656 | 51.3047730099 | 19.2944588172 |
| H79 | 29.3309746619 | 50.4337811585 | 18.0252280902 |
| N80 | 29.4874398236 | 50.6652098787 | 19.0058351208 |
| O81 | 28.9122664966 | 46.4129866828 | 26.3089989742 |
| H82 | 28.8524185324 | 47.1966424747 | 26.8824756525 |
| H83 | 28.9587765130 | 49.5188184591 | 20.1553581019 |
| C84 | 33.3512892933 | 49.9724588044 | 21.6815674688 |
| H85 | 33.3390386869 | 51.0006469156 | 21.2999545023 |
| H86 | 33.4430531930 | 50.0182066573 | 22.7719733372 |
| H87 | 34.2475958591 | 49.4712539156 | 21.2964157299 |
| H88 | 31.2030183194 | 49.7467784160 | 21.6287610158 |
| H89 | 26.6962855051 | 47.8736729647 | 25.2588915532 |
| H90 | 20.4565260741 | 51.0273768786 | 22.7441121799 |
| H91 | 18.1091958468 | 50.5888252664 | 24.0237929916 |
| H92 | 16.6903041496 | 48.0351519429 | 28.4121485886 |
| H93 | 18.0080043405 | 46.6267373237 | 30.3145047982 |
| H94 | 22.9822446668 | 45.0897659724 | 31.0244457417 |
| H95 | 25.2970879038 | 45.3780140457 | 29.6478693674 |
| H96 | 21.1851256897 | 52.8238770760 | 30.0068384367 |
| O97 | 21.2165682397 | 46.2292606135 | 25.5710418988 |
| O98 | 20.2049243870 | 45.5550030687 | 25.4459903190 |

## O2 complex

### Septet

|     |               |               |               |
|-----|---------------|---------------|---------------|
| C1  | 21.9824422219 | 51.6550857161 | 30.0105010890 |
| N2  | 23.1330775997 | 51.8363184296 | 29.2638965428 |
| C3  | 21.3579318455 | 50.5687861131 | 29.4604754819 |
| C4  | 23.1647628004 | 50.8730242887 | 28.3079506757 |
| N5  | 22.1053426431 | 50.0928022304 | 28.4021081175 |
| Fe6 | 21.6536140613 | 48.3669644961 | 27.0673580508 |
| C7  | 22.6436732876 | 49.8060353900 | 24.0787917165 |
| C8  | 24.7259711678 | 46.7970966752 | 27.2545434609 |
| C9  | 20.5026619324 | 46.3959334601 | 29.6585733560 |
| C10 | 18.4105450459 | 49.3921299688 | 26.4714169617 |
| N11 | 23.4126698199 | 48.3700934921 | 25.9039492409 |
| C12 | 23.6209521220 | 49.0506360873 | 24.7328650361 |
| C13 | 24.9905735321 | 48.8201744092 | 24.2615345026 |
| C14 | 25.5569090159 | 47.9709894098 | 25.1704530089 |
| C15 | 24.5603122962 | 47.6802626725 | 26.1830351850 |

|     |               |               |               |
|-----|---------------|---------------|---------------|
| C16 | 25.5979416967 | 49.4039249135 | 23.0152458941 |
| C17 | 26.9914675696 | 48.8509640605 | 22.7040201198 |
| C18 | 27.6523972399 | 49.5176627352 | 21.5124146534 |
| O19 | 28.6333397195 | 48.7733852439 | 20.9978659057 |
| O20 | 27.3429661559 | 50.6227851421 | 21.0843924808 |
| N21 | 22.4644834078 | 46.8501315985 | 28.2329203840 |
| C22 | 23.7597337221 | 46.4058346376 | 28.1944868692 |
| C23 | 23.9699302683 | 45.4570349264 | 29.2653424284 |
| C24 | 22.7863026523 | 45.3457479501 | 29.9388155049 |
| C25 | 21.8424704872 | 46.2242915187 | 29.2846201375 |
| N26 | 19.7785977257 | 48.0054762842 | 27.9578913788 |
| C27 | 19.5387606438 | 47.1988615825 | 29.0352982808 |
| C28 | 18.1333689051 | 47.2766469851 | 29.3909158208 |
| C29 | 17.5448440013 | 48.1186778385 | 28.4935668775 |
| C30 | 18.5868945964 | 48.5612677005 | 27.5851086199 |
| N31 | 20.6938090771 | 49.3899840106 | 25.5349333469 |
| C32 | 19.3730447063 | 49.7656725551 | 25.5234818274 |
| C33 | 19.1279707542 | 50.6019534203 | 24.3701292474 |
| C34 | 20.3139899010 | 50.7194124524 | 23.7019067728 |
| C35 | 21.2943679058 | 49.9550004657 | 24.4407968400 |
| H36 | 23.8258140240 | 52.5574965778 | 29.4018395895 |
| H37 | 20.4308775662 | 50.0930631047 | 29.7418878914 |
| H38 | 23.9524617830 | 50.7698233871 | 27.5759913865 |
| H39 | 22.9452046299 | 50.3092886905 | 23.1636844145 |
| H40 | 25.7030491462 | 46.3279857265 | 27.3451842380 |
| H41 | 20.1659471048 | 45.8115549733 | 30.5116110026 |
| H42 | 17.4039421507 | 49.7679270951 | 26.3037508399 |
| H43 | 24.9354314514 | 49.2198845359 | 22.1582143978 |
| H44 | 25.6632773579 | 50.4972741154 | 23.0935041353 |
| H45 | 27.6615461705 | 49.0005828677 | 23.5618340536 |
| H46 | 26.9670719296 | 47.7695275963 | 22.5326001519 |
| C47 | 29.7755386167 | 46.9175179471 | 25.1251789789 |
| C48 | 30.1382022141 | 48.2438991800 | 24.9607081667 |
| C49 | 31.0250270586 | 48.6520802032 | 23.9407909705 |
| C50 | 31.5500579100 | 47.7265128526 | 23.0445702663 |
| H51 | 31.2977424673 | 49.6966340936 | 23.8533637740 |
| C52 | 30.3139662625 | 45.9419645744 | 24.2569029911 |
| C53 | 31.2010734475 | 46.3402157696 | 23.2070085734 |
| N54 | 31.7245436248 | 45.4511660459 | 22.3210187862 |
| C55 | 31.4131171902 | 44.1758793645 | 22.4463299400 |
| C56 | 30.5569578397 | 43.6782119237 | 23.4579720602 |
| C57 | 30.0060912473 | 44.5604827973 | 24.3578037215 |
| H58 | 31.8499079855 | 43.4943866407 | 21.7167465790 |
| H59 | 30.3401606095 | 42.6149753555 | 23.5093933860 |
| H60 | 29.3380124637 | 44.2246307555 | 25.1445511508 |
| N61 | 32.4028894455 | 48.0529849851 | 22.0060080137 |

|     |               |               |               |
|-----|---------------|---------------|---------------|
| H62 | 32.5969317280 | 47.2316447118 | 21.4399327826 |
| O63 | 29.5414142303 | 49.1019516927 | 25.8612184091 |
| C64 | 29.9582697090 | 50.4576749661 | 25.8906502066 |
| H65 | 29.4044868923 | 50.9251893584 | 26.7074742708 |
| H66 | 31.0354263928 | 50.5414269668 | 26.0853424309 |
| H67 | 29.7183992684 | 50.9729879502 | 24.9517995540 |
| C68 | 32.3178541574 | 49.3181969667 | 21.2698612204 |
| C69 | 32.1603450337 | 48.9978915872 | 19.7674035337 |
| H70 | 33.0379532531 | 48.4173294044 | 19.4457873622 |
| H71 | 31.2923009279 | 48.3374271032 | 19.6565817412 |
| C72 | 32.0122916853 | 50.2036605092 | 18.8226152216 |
| H73 | 32.9225819457 | 50.8164053739 | 18.8425827389 |
| H74 | 31.9325220045 | 49.8247304047 | 17.7929143358 |
| C75 | 30.8173524876 | 51.1271491138 | 19.0981174195 |
| H76 | 30.8623606950 | 51.9802892734 | 18.4027857006 |
| H77 | 30.8841801975 | 51.5446058050 | 20.1094425983 |
| H78 | 28.7564138734 | 51.0174486689 | 19.2901285080 |
| H79 | 29.3532388370 | 50.1096621042 | 18.0533115261 |
| N80 | 29.5311785317 | 50.4123915418 | 19.0107623730 |
| O81 | 28.8925125901 | 46.5361914144 | 26.1097751668 |
| H82 | 28.6956594401 | 47.3378863228 | 26.6250144609 |
| H83 | 29.0545138403 | 49.2871527270 | 20.2300753234 |
| C84 | 33.5333574656 | 50.2083415178 | 21.5726756345 |
| H85 | 33.4460614849 | 51.1956263680 | 21.1026776025 |
| H86 | 33.6395012141 | 50.3547794681 | 22.6529165676 |
| H87 | 34.4548487801 | 49.7356393157 | 21.2112078635 |
| H88 | 31.4078338364 | 49.8327075285 | 21.6055380740 |
| H89 | 26.5524686500 | 47.5449769012 | 25.1577628777 |
| H90 | 20.5111931705 | 51.2660691577 | 22.7874428176 |
| H91 | 18.1702576819 | 51.0350741617 | 24.1072108062 |
| H92 | 16.5014721908 | 48.4033230120 | 28.4324813604 |
| H93 | 17.6645812370 | 46.7386896294 | 30.2063142270 |
| H94 | 22.5647027295 | 44.7213995779 | 30.7961675695 |
| H95 | 24.9010856911 | 44.9408822623 | 29.4663013475 |
| H96 | 21.7279348735 | 52.2996341751 | 30.8376494420 |
| O97 | 20.3927360103 | 45.8178552916 | 25.7137516410 |
| O98 | 19.3287004634 | 45.3370167064 | 26.0462459951 |

#### OOH complex

##### Singlet

|     |               |               |               |
|-----|---------------|---------------|---------------|
| C1  | 21.1053762736 | 52.0974926859 | 28.5627759377 |
| N2  | 22.4189836451 | 51.8064131576 | 28.8749032549 |
| C3  | 20.6366748230 | 51.0017097065 | 27.8918332260 |
| C4  | 22.7004489090 | 50.5703552047 | 28.3956054706 |
| N5  | 21.6410739392 | 50.0588186304 | 27.7950658691 |
| Fe6 | 21.5314724916 | 48.1554502831 | 26.9053439123 |

|     |               |               |               |
|-----|---------------|---------------|---------------|
| C7  | 22.4723093928 | 49.7012525432 | 23.9829256546 |
| C8  | 24.8018440275 | 47.4630771420 | 27.5753321203 |
| C9  | 20.6326977270 | 46.9535454757 | 29.9741320499 |
| C10 | 18.2578714132 | 48.6542256394 | 26.1167117910 |
| N11 | 23.2959180769 | 48.5387800447 | 25.9693859719 |
| C12 | 23.4921272934 | 49.1726054417 | 24.7807248051 |
| C13 | 24.9085005166 | 49.1860059783 | 24.4212762166 |
| C14 | 25.5419886753 | 48.5169477709 | 25.4268205426 |
| C15 | 24.5382916762 | 48.1222957124 | 26.3882527521 |
| C16 | 25.4900357961 | 49.8239976280 | 23.1900095572 |
| C17 | 26.9537559685 | 49.4454098240 | 22.9483844453 |
| C18 | 27.5940671770 | 50.2292256715 | 21.8153733788 |
| O19 | 28.6405025122 | 49.5873313561 | 21.2871557705 |
| O20 | 27.2225036296 | 51.3345991148 | 21.4544482805 |
| N21 | 22.5222680875 | 47.3911492579 | 28.4785063532 |
| C22 | 23.8558484492 | 47.1360709170 | 28.5560891731 |
| C23 | 24.1812547939 | 46.5151874876 | 29.8228672125 |
| C24 | 23.0153269025 | 46.4028050272 | 30.5128053175 |
| C25 | 21.9775922744 | 46.9396058708 | 29.6612683434 |
| N26 | 19.7940782944 | 47.8822110141 | 27.8670632508 |
| C27 | 19.6108093529 | 47.3709002002 | 29.1139519734 |
| C28 | 18.2007057260 | 47.2816597364 | 29.4252296301 |
| C29 | 17.5321490638 | 47.7310202257 | 28.3307645894 |
| C30 | 18.5347539327 | 48.1084638557 | 27.3577273726 |
| N31 | 20.5605430559 | 49.0175942372 | 25.3582148628 |
| C32 | 19.2117535266 | 49.0937344966 | 25.1905174773 |
| C33 | 18.8911984601 | 49.7446806964 | 23.9375844907 |
| C34 | 20.0754531088 | 50.0691189987 | 23.3554076403 |
| C35 | 21.1174403195 | 49.6025202714 | 24.2446284477 |
| H36 | 23.0585993370 | 52.4036225118 | 29.3787942347 |
| H37 | 19.6575430731 | 50.8245423708 | 27.4774231559 |
| H38 | 23.6586431827 | 50.0854302788 | 28.4991620745 |
| H39 | 22.7603457324 | 50.1924302150 | 23.0593139401 |
| H40 | 25.8338977407 | 47.1927208146 | 27.7780558702 |
| H41 | 20.3382126063 | 46.5670465949 | 30.9449311225 |
| H42 | 17.2132032680 | 48.7799490552 | 25.8491175794 |
| H43 | 24.8981277725 | 49.5444269057 | 22.3081886985 |
| H44 | 25.4192441197 | 50.9181112112 | 23.2520110043 |
| H45 | 27.5499867944 | 49.6554580044 | 23.8480133923 |
| H46 | 27.0662994843 | 48.3741402620 | 22.7529868716 |
| C47 | 29.8470141457 | 46.1238070162 | 25.0968710080 |
| C48 | 30.0462448429 | 47.5161627370 | 25.0448561444 |
| C49 | 30.6824119686 | 48.1278767906 | 23.9626381974 |
| C50 | 31.1314800674 | 47.3533321036 | 22.8782881550 |
| H51 | 30.8180760357 | 49.2008084783 | 23.9504175459 |
| C52 | 30.2971635110 | 45.3061763404 | 24.0285239363 |

|     |               |               |               |
|-----|---------------|---------------|---------------|
| C53 | 30.9438790781 | 45.9113822179 | 22.9163782687 |
| N54 | 31.4012892612 | 45.2033151268 | 21.8616609911 |
| C55 | 31.2401861199 | 43.8890266469 | 21.8684300335 |
| C56 | 30.6135801319 | 43.1899640182 | 22.9233989905 |
| C57 | 30.1399920899 | 43.8984615550 | 24.0068649984 |
| H58 | 31.6212404823 | 43.3500952762 | 21.0032963186 |
| H59 | 30.5105306114 | 42.1107584664 | 22.8709854925 |
| H60 | 29.6500937802 | 43.4028735228 | 24.8383896667 |
| N61 | 31.7258424525 | 47.8517468046 | 21.7767004115 |
| H62 | 31.9889761797 | 47.1347703110 | 21.1034534399 |
| O63 | 29.5526420776 | 48.1689449564 | 26.1380930747 |
| C64 | 29.8777035255 | 49.5467610372 | 26.3290941970 |
| H65 | 29.4590230658 | 49.8190811660 | 27.2983902289 |
| H66 | 30.9638703865 | 49.6922514355 | 26.3405808503 |
| H67 | 29.4266497534 | 50.1693176265 | 25.5481166393 |
| C68 | 31.9839571546 | 49.2546531229 | 21.4486814909 |
| C69 | 31.9257047417 | 49.3845368847 | 19.9130852139 |
| H70 | 32.7221802227 | 48.7601323312 | 19.4825998430 |
| H71 | 30.9744753839 | 48.9572398963 | 19.5755274881 |
| C72 | 32.0775119322 | 50.8094840493 | 19.3518605635 |
| H73 | 33.0675013266 | 51.2138382583 | 19.5959250702 |
| H74 | 32.0487445655 | 50.7405976800 | 18.2554872472 |
| C75 | 31.0238705920 | 51.8282233733 | 19.8096151945 |
| H76 | 31.2392861650 | 52.7945649649 | 19.3306805275 |
| H77 | 31.0933998054 | 51.9941989428 | 20.8917206658 |
| H78 | 28.9610868714 | 52.0564819507 | 19.8301291414 |
| H79 | 29.5144616633 | 51.2245269288 | 18.5296339465 |
| N80 | 29.6505223175 | 51.3646000344 | 19.5309824992 |
| H81 | 29.0414551292 | 50.1788817806 | 20.5525807754 |
| C82 | 33.3183001433 | 49.7201541655 | 22.0543958371 |
| H83 | 33.4751361290 | 50.7909435030 | 21.8869121536 |
| H84 | 33.3408091082 | 49.5405720535 | 23.1344560733 |
| H85 | 34.1579059137 | 49.1768251408 | 21.6057882220 |
| H86 | 31.1602731287 | 49.8353953795 | 21.8773894718 |
| H87 | 26.5974979687 | 48.2983973204 | 25.5301771041 |
| H88 | 20.2484592919 | 50.5675442662 | 22.4104544313 |
| H89 | 17.8878615206 | 49.9256575018 | 23.5733997147 |
| H90 | 16.4636670257 | 47.8127868452 | 28.1791362870 |
| H91 | 17.7961061736 | 46.9124828297 | 30.3590497172 |
| H92 | 22.8516953532 | 45.9850119285 | 31.4981059397 |
| H93 | 25.1751862004 | 46.2107519389 | 30.1262401827 |
| H94 | 20.6400069999 | 53.0303636156 | 28.8402575108 |
| O95 | 21.4240086556 | 46.5964756759 | 26.0573471688 |
| O96 | 21.1052543008 | 45.4868762758 | 26.9161017264 |
| H97 | 20.7872934528 | 44.8573411813 | 26.2440673929 |
| O98 | 29.2382354981 | 45.5504844341 | 26.1571808615 |



|     |               |               |               |
|-----|---------------|---------------|---------------|
| H99 | 29.0434323095 | 46.2554721876 | 26.8018395669 |
|-----|---------------|---------------|---------------|

OOH complex

Triplet

|     |               |               |               |
|-----|---------------|---------------|---------------|
| C1  | 21.0463455698 | 51.6854276056 | 28.7411049171 |
| N2  | 22.3468079453 | 51.3661065953 | 29.0794029483 |
| C3  | 20.6143071329 | 50.6636517643 | 27.9413089436 |
| C4  | 22.6568764273 | 50.1863541208 | 28.4893392157 |
| N5  | 21.6277587743 | 49.7370944518 | 27.7935590473 |
| Fe6 | 21.5679924382 | 47.9303795347 | 26.7184092416 |
| C7  | 22.5686412396 | 49.7684520646 | 23.9908871864 |
| C8  | 24.8253201042 | 47.1947777475 | 27.3991340222 |
| C9  | 20.6037052165 | 46.4347210357 | 29.6340057807 |
| C10 | 18.3129540168 | 48.4674194305 | 25.8897428716 |
| N11 | 23.3526231101 | 48.4209716301 | 25.8709400294 |
| C12 | 23.5747979716 | 49.1785777568 | 24.7544675869 |
| C13 | 24.9975843884 | 49.2367027079 | 24.4391304211 |
| C14 | 25.6083358864 | 48.4707139314 | 25.3901974877 |
| C15 | 24.5838109495 | 47.9756237091 | 26.2755627427 |
| C16 | 25.6162954351 | 49.9892863102 | 23.2927957885 |
| C17 | 27.0709700729 | 49.5857932835 | 23.0263160747 |
| C18 | 27.7271782204 | 50.4162293634 | 21.9359732479 |
| O19 | 28.6816092995 | 49.7359754987 | 21.2945610647 |
| O20 | 27.4377043332 | 51.5758524765 | 21.6908459671 |
| N21 | 22.5272513972 | 47.0247092839 | 28.2375160400 |
| C22 | 23.8654139392 | 46.7668833894 | 28.3204746942 |
| C23 | 24.1627354276 | 46.0276874972 | 29.5253196724 |
| C24 | 22.9792185204 | 45.8465818638 | 30.1734949898 |
| C25 | 21.9620726099 | 46.4593073312 | 29.3544963464 |
| N26 | 19.8073370136 | 47.5489411851 | 27.6040777331 |
| C27 | 19.5975375779 | 46.9192517181 | 28.7973303389 |
| C28 | 18.1838195260 | 46.7888840122 | 29.0580249332 |
| C29 | 17.5394677358 | 47.3329246980 | 27.9893969964 |
| C30 | 18.5624163815 | 47.8076742872 | 27.0875448261 |
| N31 | 20.6281656551 | 48.9317077276 | 25.2355015001 |
| C32 | 19.2777728718 | 49.0055403039 | 25.0367076318 |
| C33 | 18.9840031466 | 49.7687112084 | 23.8461154743 |
| C34 | 20.1813076348 | 50.1651603783 | 23.3343329134 |
| C35 | 21.2017355909 | 49.6292115834 | 24.2042732694 |
| H36 | 22.9605117771 | 51.9098505179 | 29.6688869861 |
| H37 | 19.6553097460 | 50.5283305537 | 27.4682248076 |
| H38 | 23.6126980121 | 49.6952757298 | 28.5851286642 |
| H39 | 22.8708169416 | 50.3524176993 | 23.1268956413 |
| H40 | 25.8564864203 | 46.9126500244 | 27.5924904401 |
| H41 | 20.2933192031 | 45.9545844344 | 30.5576177537 |
| H42 | 17.2731448677 | 48.6037314530 | 25.6075947357 |

|     |               |               |               |
|-----|---------------|---------------|---------------|
| H43 | 25.0298601569 | 49.8245671403 | 22.3790547804 |
| H44 | 25.5792801332 | 51.0718220318 | 23.4731276333 |
| H45 | 27.6740243068 | 49.7246254465 | 23.9349565146 |
| H46 | 27.1475417827 | 48.5256368844 | 22.7649082605 |
| C47 | 29.9549723398 | 47.1275584126 | 25.6873430128 |
| C48 | 30.6410903277 | 48.3212034412 | 25.3960139858 |
| C49 | 31.1559844367 | 48.5801360560 | 24.1218556996 |
| C50 | 30.9962263919 | 47.6374150938 | 23.0907831837 |
| H51 | 31.6773083391 | 49.5080663817 | 23.9293963729 |
| C52 | 29.7886530256 | 46.1445531176 | 24.6796595058 |
| C53 | 30.3122134402 | 46.3870644185 | 23.3793084690 |
| N54 | 30.1971505340 | 45.5006795989 | 22.3670091967 |
| C55 | 29.5717388628 | 44.3569658704 | 22.5986903721 |
| C56 | 29.0166538188 | 44.0176960432 | 23.8524116267 |
| C57 | 29.1243887800 | 44.9115102331 | 24.8957150575 |
| H58 | 29.4981891785 | 43.6664311338 | 21.7608917381 |
| H59 | 28.5145605899 | 43.0639856249 | 23.9814079258 |
| H60 | 28.7145874308 | 44.6896736829 | 25.8754752755 |
| N61 | 31.4297798136 | 47.8078135907 | 21.8267902541 |
| H62 | 31.2181486997 | 47.0208988304 | 21.2174217424 |
| O63 | 30.7392600739 | 49.1562882044 | 26.4677987787 |
| C64 | 31.5496367606 | 50.3274140830 | 26.3668167796 |
| H65 | 31.5380945356 | 50.7825636838 | 27.3576885269 |
| H66 | 32.5783882497 | 50.0666243665 | 26.0927312893 |
| H67 | 31.1346200536 | 51.0298255191 | 25.6348875944 |
| C68 | 32.0069091957 | 49.0195009075 | 21.2464735550 |
| C69 | 31.6481833986 | 49.0371673239 | 19.7471904655 |
| H70 | 32.1801426522 | 48.2119904566 | 19.2523127034 |
| H71 | 30.5783159135 | 48.8211368050 | 19.6538228589 |
| C72 | 31.9719808274 | 50.3458518477 | 19.0052370698 |
| H73 | 33.0514171514 | 50.5409791686 | 19.0230204760 |
| H74 | 31.7142054042 | 50.2060753277 | 17.9462765899 |
| C75 | 31.2538572785 | 51.5995435131 | 19.5270708284 |
| H76 | 31.5876030837 | 52.4666972975 | 18.9385369620 |
| H77 | 31.5378820775 | 51.8017804786 | 20.5666814833 |
| H78 | 29.3168097694 | 52.2638419958 | 19.8769538367 |
| H79 | 29.4561874214 | 51.3291166612 | 18.5415548463 |
| N80 | 29.7862862704 | 51.4394822899 | 19.5005637210 |
| H81 | 29.0925301407 | 50.3401356708 | 20.5793979800 |
| C82 | 33.5209141582 | 49.0880671433 | 21.5066021777 |
| H83 | 33.9417893665 | 50.0308543828 | 21.1414296086 |
| H84 | 33.7422436251 | 49.0114778308 | 22.5762949326 |
| H85 | 34.0348213743 | 48.2639099562 | 20.9988782800 |
| H86 | 31.5098750118 | 49.8668745229 | 21.7339721752 |
| H87 | 26.6616630736 | 48.2465703747 | 25.4991901912 |
| H88 | 20.3724554276 | 50.7563687666 | 22.4481891710 |

|     |               |               |               |
|-----|---------------|---------------|---------------|
| H89 | 17.9894805767 | 49.9724810196 | 23.4699430490 |
| H90 | 16.4744418098 | 47.4179600909 | 27.8164366687 |
| H91 | 17.7563135310 | 46.3309786918 | 29.9409864610 |
| H92 | 22.7942886127 | 45.3348220149 | 31.1090782263 |
| H93 | 25.1501994531 | 45.6979685521 | 29.8229922524 |
| H94 | 20.5632776160 | 52.5839610802 | 29.0919799644 |
| O95 | 21.5031495077 | 46.4606153423 | 25.7205343355 |
| O96 | 21.1817327369 | 45.2685710901 | 26.4600783458 |
| H97 | 20.7893007105 | 44.7401220824 | 25.7418375631 |
| O98 | 29.4450083708 | 46.9062533219 | 26.9226332949 |
| H99 | 29.7125504430 | 47.6561115901 | 27.4862590188 |

OOH complex

Quintet

|     |               |               |               |
|-----|---------------|---------------|---------------|
| C1  | 21.2326093032 | 51.8718711371 | 28.4528800507 |
| N2  | 21.9348757441 | 51.2082264520 | 29.4393285372 |
| C3  | 21.0404784030 | 50.9526488534 | 27.4588236527 |
| C4  | 22.1410834919 | 49.9351989585 | 29.0247071534 |
| N5  | 21.6112979326 | 49.7486194669 | 27.8277463020 |
| Fe6 | 21.6243696006 | 47.8776572008 | 26.7171706265 |
| C7  | 22.5242687394 | 49.6277710698 | 23.9012417068 |
| C8  | 24.9551782223 | 47.3818490761 | 27.4468763801 |
| C9  | 20.7372367384 | 46.2414187651 | 29.5872044363 |
| C10 | 18.2990451886 | 48.4339532504 | 26.0014317287 |
| N11 | 23.4406310623 | 48.4657796215 | 25.8512180285 |
| C12 | 23.5871143549 | 49.1500881446 | 24.6783260678 |
| C13 | 25.0090692214 | 49.2754356749 | 24.3523909606 |
| C14 | 25.6720110924 | 48.6278655352 | 25.3583204378 |
| C15 | 24.6833787470 | 48.1223136898 | 26.2868346913 |
| C16 | 25.5822508257 | 49.9795392293 | 23.1537546113 |
| C17 | 27.0815821442 | 49.7310238321 | 22.9774554415 |
| C18 | 27.7004000207 | 50.5414162498 | 21.8523761683 |
| O19 | 28.8678290552 | 50.0211184511 | 21.4554314243 |
| O20 | 27.2177678586 | 51.5573447112 | 21.3850820146 |
| N21 | 22.6768773583 | 47.0009476156 | 28.2735872756 |
| C22 | 24.0300890214 | 46.8529477647 | 28.3628332361 |
| C23 | 24.3488466171 | 46.0769520704 | 29.5438270465 |
| C24 | 23.1633171122 | 45.7619887563 | 30.1439482600 |
| C25 | 22.1132862157 | 46.3402310105 | 29.3316419351 |
| N26 | 19.8097623614 | 47.4103781366 | 27.6365800243 |
| C27 | 19.6713313858 | 46.7379865986 | 28.8186770578 |
| C28 | 18.2642027499 | 46.6238863900 | 29.1387299077 |
| C29 | 17.5770352451 | 47.2406900669 | 28.1312382045 |
| C30 | 18.5615423691 | 47.7329584323 | 27.1908564292 |
| N31 | 20.5864938454 | 48.8630776146 | 25.2101814290 |
| C32 | 19.2263992786 | 48.9477909780 | 25.0838063061 |

|     |               |               |               |
|-----|---------------|---------------|---------------|
| C33 | 18.9051247535 | 49.6724229979 | 23.8709115079 |
| C34 | 20.0909196921 | 50.0073511323 | 23.2840572591 |
| C35 | 21.1437658947 | 49.4909920427 | 24.1359662156 |
| H36 | 22.2377829143 | 51.5970174802 | 30.3210391700 |
| H37 | 20.5352692457 | 51.0690411209 | 26.5142518613 |
| H38 | 22.6649636297 | 49.1903647770 | 29.6021637618 |
| H39 | 22.7925272535 | 50.1592373398 | 22.9920592167 |
| H40 | 26.0042843791 | 47.1805746170 | 27.6511559130 |
| H41 | 20.4604692825 | 45.7030522510 | 30.4903545446 |
| H42 | 17.2514899785 | 48.6036766773 | 25.7672467099 |
| H43 | 25.0573698583 | 49.6599641587 | 22.2434539677 |
| H44 | 25.4074622540 | 51.0613210201 | 23.2222672828 |
| H45 | 27.6214258015 | 50.0072043461 | 23.8940595482 |
| H46 | 27.2933551243 | 48.6691787061 | 22.8104401813 |
| C47 | 29.8534346355 | 47.1684335986 | 25.7381398036 |
| C48 | 30.6250934855 | 48.3122284615 | 25.4582386250 |
| C49 | 31.1496548549 | 48.5494375040 | 24.1850119593 |
| C50 | 30.9181365625 | 47.6339143824 | 23.1429487906 |
| H51 | 31.7345036490 | 49.4401680731 | 23.9985384727 |
| C52 | 29.6155761874 | 46.2105980344 | 24.7208631778 |
| C53 | 30.1465531103 | 46.4325009041 | 23.4197647559 |
| N54 | 29.9556550252 | 45.5737047997 | 22.3953896336 |
| C55 | 29.2486850339 | 44.4760950767 | 22.6166783302 |
| C56 | 28.6823538517 | 44.1590197626 | 23.8710586388 |
| C57 | 28.8643447936 | 45.0268353324 | 24.9260497942 |
| H58 | 29.1146675137 | 43.8071427339 | 21.7689247073 |
| H59 | 28.1115939203 | 43.2435637887 | 23.9909300407 |
| H60 | 28.4455046130 | 44.8222739419 | 25.9055750164 |
| N61 | 31.3634717949 | 47.7859678946 | 21.8801452635 |
| H62 | 31.0844582938 | 47.0246803156 | 21.2645642005 |
| O63 | 30.7853430568 | 49.1238363755 | 26.5395258436 |
| C64 | 31.6254695465 | 50.2733239529 | 26.4303231256 |
| H65 | 31.6335525137 | 50.7300070328 | 27.4204690763 |
| H66 | 32.6447826832 | 49.9853260089 | 26.1484362201 |
| H67 | 31.2226097784 | 50.9846234520 | 25.7001033220 |
| C68 | 31.9887563224 | 48.9713523212 | 21.2895540406 |
| C69 | 31.5888604381 | 49.0067427280 | 19.8000193372 |
| H70 | 32.0177900200 | 48.1221580166 | 19.3071270725 |
| H71 | 30.4996684461 | 48.9036005614 | 19.7437380098 |
| C72 | 32.0274473834 | 50.2549904347 | 19.0130620385 |
| H73 | 33.1217193175 | 50.3274146714 | 18.9883290363 |
| H74 | 31.7178284058 | 50.1158811063 | 17.9677529530 |
| C75 | 31.4722502127 | 51.5975665744 | 19.5086867654 |
| H76 | 31.8658817904 | 52.3971134529 | 18.8638842599 |
| H77 | 31.8288711760 | 51.8102636664 | 20.5238843209 |
| H78 | 29.6354190646 | 52.5042125895 | 19.8373409091 |

|     |               |               |               |
|-----|---------------|---------------|---------------|
| H79 | 29.6118958296 | 51.4187140678 | 18.6229177833 |
| N80 | 29.9958196196 | 51.5934862741 | 19.5522722455 |
| H81 | 29.2565346102 | 50.6074851500 | 20.7162552402 |
| C82 | 33.5107057278 | 48.9538666194 | 21.5042385144 |
| H83 | 33.9702891775 | 49.8780280315 | 21.1382670768 |
| H84 | 33.7579256341 | 48.8520785677 | 22.5661051014 |
| H85 | 33.9656268837 | 48.1104682392 | 20.9723515867 |
| H86 | 31.5531371734 | 49.8416872439 | 21.7946918106 |
| H87 | 26.7392384443 | 48.4868509269 | 25.4684764819 |
| H88 | 20.2461849081 | 50.5530603473 | 22.3621049260 |
| H89 | 17.9038672140 | 49.8900772866 | 23.5205867313 |
| H90 | 16.5049589979 | 47.3532735578 | 28.0304810612 |
| H91 | 17.8602468808 | 46.1383648006 | 30.0183763959 |
| H92 | 23.0068080012 | 45.1840012106 | 31.0463551718 |
| H93 | 25.3475387024 | 45.8060687590 | 29.8631104485 |
| H94 | 20.9419047440 | 52.9065244710 | 28.5482672599 |
| O95 | 21.6036326596 | 46.3598822537 | 25.6860072694 |
| O96 | 21.3895704249 | 45.1667650325 | 26.4000085022 |
| H97 | 20.4146169168 | 45.1003712259 | 26.3917698748 |
| O98 | 29.3327240634 | 46.9724484914 | 26.9725461055 |
| H99 | 29.6443233741 | 47.7026946700 | 27.5395915441 |

OOH complex

Septet

|     |               |               |               |
|-----|---------------|---------------|---------------|
| C1  | 20.4480586219 | 52.2225464225 | 28.4987166959 |
| N2  | 21.6625801163 | 51.8974678302 | 29.0713542306 |
| C3  | 20.1055834755 | 51.1402981646 | 27.7344693791 |
| C4  | 22.0042813622 | 50.6553824775 | 28.6434169415 |
| N5  | 21.0832589479 | 50.1695694602 | 27.8327860730 |
| Fe6 | 21.1325154364 | 48.0454476858 | 26.8072513819 |
| C7  | 22.2886527899 | 49.6746729996 | 23.9880998650 |
| C8  | 24.3715371888 | 47.6373684059 | 27.8729269183 |
| C9  | 19.9903492139 | 46.8089815478 | 29.8120437970 |
| C10 | 17.9029497967 | 48.6433218215 | 25.8273560487 |
| N11 | 23.0121490040 | 48.5783114790 | 26.0528226901 |
| C12 | 23.2733620169 | 49.2179697822 | 24.8733275132 |
| C13 | 24.7179705285 | 49.3329355136 | 24.6828119831 |
| C14 | 25.2820519096 | 48.7332017086 | 25.7771332025 |
| C15 | 24.2103201587 | 48.2727407052 | 26.6307450957 |
| C16 | 25.3969392158 | 50.0011444633 | 23.5196498337 |
| C17 | 26.8952155840 | 49.6891179182 | 23.4167940899 |
| C18 | 27.5801790636 | 50.5015906552 | 22.3307544674 |
| O19 | 28.5952017967 | 49.8468428685 | 21.7604209823 |
| O20 | 27.2539566888 | 51.6399955503 | 22.0319759937 |
| N21 | 22.0299352388 | 47.3683577114 | 28.5627282929 |
| C22 | 23.3734071762 | 47.2220822281 | 28.7691901545 |

|     |               |               |               |
|-----|---------------|---------------|---------------|
| C23 | 23.5934501275 | 46.5985217385 | 30.0566633218 |
| C24 | 22.3618604368 | 46.3770306976 | 30.6045023562 |
| C25 | 21.3842332632 | 46.8598647652 | 29.6535360646 |
| N26 | 19.2599839940 | 47.7855540168 | 27.6846979191 |
| C27 | 19.0066671773 | 47.2305447407 | 28.9053821196 |
| C28 | 17.5746077672 | 47.1438987105 | 29.1036564917 |
| C29 | 16.9880913576 | 47.6509816180 | 27.9802163410 |
| C30 | 18.0595435005 | 48.0523701428 | 27.0923794035 |
| N31 | 20.2510454380 | 48.9921862209 | 25.1783174925 |
| C32 | 18.9036462694 | 49.0868878063 | 24.9490815608 |
| C33 | 18.6826843108 | 49.7502569433 | 23.6824440132 |
| C34 | 19.9137080655 | 50.0513947851 | 23.1730939823 |
| C35 | 20.8931053450 | 49.5699367197 | 24.1232557787 |
| H36 | 22.1988375330 | 52.4766737454 | 29.7013961114 |
| H37 | 19.2276169099 | 50.9920854467 | 27.1251528777 |
| H38 | 22.9104730397 | 50.1490712169 | 28.9408723972 |
| H39 | 22.6382689112 | 50.1669098242 | 23.0848202814 |
| H40 | 25.3969763356 | 47.4570317274 | 28.1860955444 |
| H41 | 19.6305606434 | 46.3795245078 | 30.7435166620 |
| H42 | 16.8785989378 | 48.7935613190 | 25.4958940400 |
| H43 | 24.9073969583 | 49.7024399528 | 22.5831983692 |
| H44 | 25.2749377142 | 51.0907346044 | 23.5791173511 |
| H45 | 27.3944910858 | 49.9443520075 | 24.3621497376 |
| H46 | 27.0739744094 | 48.6235108073 | 23.2433906876 |
| C47 | 31.6146751695 | 46.1173521902 | 25.2954939759 |
| C48 | 32.0055721570 | 47.4570689628 | 25.1133305445 |
| C49 | 32.0582434804 | 48.0409887523 | 23.8436889580 |
| C50 | 31.7235117318 | 47.2866448320 | 22.7060464797 |
| H51 | 32.3565002816 | 49.0752873458 | 23.7367554036 |
| C52 | 31.2663000879 | 45.3254150109 | 24.1724345763 |
| C53 | 31.3220213227 | 45.8994131399 | 22.8724970133 |
| N54 | 31.0126073933 | 45.2085549747 | 21.7536219708 |
| C55 | 30.6407295583 | 43.9439588041 | 21.8770626806 |
| C56 | 30.5516731053 | 43.2799857065 | 23.1205820181 |
| C57 | 30.8652780655 | 43.9701332010 | 24.2714264392 |
| H58 | 30.3987613096 | 43.4179360529 | 20.9556758614 |
| H59 | 30.2405700330 | 42.2407086435 | 23.1575880725 |
| H60 | 30.8125662029 | 43.4990613190 | 25.2473695640 |
| N61 | 31.7422917115 | 47.7581780168 | 21.4424637538 |
| H62 | 31.4684238715 | 47.0643249795 | 20.7504728909 |
| O63 | 32.3154134328 | 48.0847394102 | 26.2812721680 |
| C64 | 32.8403093976 | 49.4110620676 | 26.2428947492 |
| H65 | 33.0548812439 | 49.6754701214 | 27.2788438812 |
| H66 | 33.7641401384 | 49.4481074351 | 25.6539716970 |
| H67 | 32.1059050029 | 50.1119563083 | 25.8292756856 |
| C68 | 32.0835298464 | 49.1083957766 | 20.9953963256 |

|     |               |               |               |
|-----|---------------|---------------|---------------|
| C69 | 31.4526038006 | 49.3004293526 | 19.6022684164 |
| H70 | 31.8976489994 | 48.5597974923 | 18.9221513989 |
| H71 | 30.3859293718 | 49.0594255035 | 19.6766385072 |
| C72 | 31.6254809134 | 50.6942136430 | 18.9751357943 |
| H73 | 32.6888445574 | 50.9200151692 | 18.8300294642 |
| H74 | 31.1899295869 | 50.6640250435 | 17.9665443865 |
| C75 | 30.9889944341 | 51.8564158995 | 19.7497477355 |
| H76 | 31.1919761793 | 52.7927890716 | 19.2092976013 |
| H77 | 31.4505183347 | 51.9600613797 | 20.7393908262 |
| H78 | 29.1116563961 | 52.4114665988 | 20.4605380241 |
| H79 | 29.0618670581 | 51.5712713132 | 19.0642547887 |
| N80 | 29.5463078467 | 51.6351412525 | 19.9602170079 |
| H81 | 28.9955600823 | 50.4577508870 | 21.0461442228 |
| C82 | 33.6072060043 | 49.3219124321 | 20.9995012781 |
| H83 | 33.8601898627 | 50.3628496189 | 20.7731051427 |
| H84 | 34.0388767635 | 49.0757416289 | 21.9748509138 |
| H85 | 34.0858516416 | 48.6806252847 | 20.2506699921 |
| H86 | 31.6110474291 | 49.8088415576 | 21.6969778135 |
| H87 | 26.3348390400 | 48.6098838423 | 25.9962891304 |
| H88 | 20.1426083597 | 50.5532450166 | 22.2416929237 |
| H89 | 17.7131878567 | 49.9609323761 | 23.2486855471 |
| H90 | 15.9312551521 | 47.7485963637 | 27.7673835582 |
| H91 | 17.0891434361 | 46.7460952335 | 29.9860584622 |
| H92 | 22.1311317750 | 45.9238550943 | 31.5602114343 |
| H93 | 24.5617079600 | 46.3611948542 | 30.4797126942 |
| H94 | 19.9578358899 | 53.1655327778 | 28.6852354881 |
| O95 | 21.1173343120 | 46.3181530767 | 25.9525600217 |
| O96 | 20.7649119132 | 45.2120681611 | 26.7443552040 |
| H97 | 20.7522016156 | 44.5027772905 | 26.0755927217 |
| O98 | 31.5712897142 | 45.5694099742 | 26.5294446175 |
| H99 | 31.8683728101 | 46.2470341542 | 27.1648389601 |

#### HOOH complex

##### Singlet

|     |               |               |               |
|-----|---------------|---------------|---------------|
| C1  | 21.1826810720 | 51.7994912163 | 29.1421248099 |
| N2  | 22.3630561402 | 51.1532355162 | 29.4602031158 |
| C3  | 20.5305105476 | 50.9739964514 | 28.2734338545 |
| C4  | 22.4051461665 | 49.9810706021 | 28.7988882335 |
| N5  | 21.3031583378 | 49.8451441859 | 28.0687422507 |
| Fe6 | 20.8826339261 | 48.3084563561 | 26.9478933838 |
| C7  | 22.1808111375 | 49.8945701863 | 24.2491300944 |
| C8  | 23.9348769132 | 46.8279731793 | 27.5575129481 |
| C9  | 19.5957256883 | 46.7789061548 | 29.7216809441 |
| C10 | 17.7568036873 | 49.5624310038 | 26.2013352400 |
| N11 | 22.6887551240 | 48.3498557566 | 26.0841818275 |
| C12 | 23.0443852934 | 49.1029902067 | 24.9873847916 |

|     |               |               |               |
|-----|---------------|---------------|---------------|
| C13 | 24.4536272841 | 48.9200565599 | 24.6766648422 |
| C14 | 24.9228859106 | 48.0345978744 | 25.6035126908 |
| C15 | 23.8321197571 | 47.6876321779 | 26.4729770471 |
| C16 | 25.1775155741 | 49.5922283176 | 23.5458406329 |
| C17 | 26.6458130094 | 49.1784601345 | 23.4041086919 |
| C18 | 27.3428566240 | 49.9703845432 | 22.3078559325 |
| O19 | 28.4551457850 | 49.3789447157 | 21.8626034071 |
| O20 | 26.9318911351 | 51.0418047170 | 21.8917867591 |
| N21 | 21.6066683935 | 47.0156323056 | 28.3162879120 |
| C22 | 22.8932527122 | 46.5242299853 | 28.4253124110 |
| C23 | 23.0104862053 | 45.6939341085 | 29.5923843172 |
| C24 | 21.7945570183 | 45.7015310175 | 30.2079106757 |
| C25 | 20.9242965447 | 46.5265328940 | 29.4140379314 |
| N26 | 19.0363553566 | 48.1491923786 | 27.7534403129 |
| C27 | 18.7239796167 | 47.5395367200 | 28.9564570215 |
| C28 | 17.3501450587 | 47.7858793926 | 29.2927715717 |
| C29 | 16.8237722276 | 48.5553472393 | 28.2967016348 |
| C30 | 17.8751958152 | 48.7937101238 | 27.3513506416 |
| N31 | 20.1172776710 | 49.4582114737 | 25.5145460572 |
| C32 | 18.8067337236 | 49.8607254600 | 25.3460672772 |
| C33 | 18.6883460689 | 50.6931438608 | 24.1781975472 |
| C34 | 19.9362325628 | 50.8067619473 | 23.6484175983 |
| C35 | 20.8202597491 | 50.0349320832 | 24.4839377996 |
| H36 | 23.0751712769 | 51.4947823668 | 30.0917696632 |
| H37 | 19.5783022367 | 51.1059598137 | 27.7875472273 |
| H38 | 23.2124918504 | 49.2691714955 | 28.8610870925 |
| H39 | 22.5883777332 | 50.4289158168 | 23.3980476722 |
| H40 | 24.9001904591 | 46.3714418802 | 27.7515843959 |
| H41 | 19.2031900305 | 46.3386942845 | 30.6325647964 |
| H42 | 16.7811532675 | 49.9764965565 | 25.9682803407 |
| H43 | 24.6572814186 | 49.3831993375 | 22.6015627418 |
| H44 | 25.1341742449 | 50.6825220522 | 23.6607498450 |
| H45 | 27.1899534197 | 49.3619310433 | 24.3419217887 |
| H46 | 26.7482076756 | 48.1088510868 | 23.1905318737 |
| C47 | 32.7637201438 | 46.2105776200 | 25.1555522529 |
| C48 | 32.7346898827 | 47.6266010758 | 24.9654723416 |
| C49 | 32.5525705528 | 48.1810422757 | 23.7082976567 |
| C50 | 32.3929271507 | 47.3370320788 | 22.5825697119 |
| H51 | 32.5330763707 | 49.2553344704 | 23.5830912156 |
| C52 | 32.6017104285 | 45.3290583073 | 24.0474159110 |
| C53 | 32.4152905254 | 45.8820207994 | 22.7585958942 |
| N54 | 32.2603295988 | 45.1335903045 | 21.6537778243 |
| C55 | 32.2845715829 | 43.8115055335 | 21.7831461340 |
| C56 | 32.4657890054 | 43.1594575660 | 23.0201242566 |
| C57 | 32.6260432999 | 43.9190387272 | 24.1622827902 |
| H58 | 32.1574552339 | 43.2347609136 | 20.8701786794 |



|      |               |               |               |
|------|---------------|---------------|---------------|
| H59  | 32.4803858600 | 42.0753608260 | 23.0628599013 |
| H60  | 32.7715187893 | 43.4585489869 | 25.1338082531 |
| N61  | 32.2196378200 | 47.7712300023 | 21.3352669707 |
| H62  | 32.1331207813 | 47.0108374688 | 20.6573220545 |
| O63  | 32.9025244784 | 48.3019494221 | 26.1187544995 |
| C64  | 32.9555313845 | 49.7375844773 | 26.1042879013 |
| H65  | 33.1166113349 | 50.0344430214 | 27.1400140602 |
| H66  | 33.7890386119 | 50.0818394462 | 25.4836060331 |
| H67  | 32.0093768251 | 50.1508377278 | 25.7394456194 |
| C68  | 32.2088156229 | 49.1557770439 | 20.8295908940 |
| C69  | 31.4593415961 | 49.1326611924 | 19.4827453559 |
| H70  | 31.9965217765 | 48.4536743702 | 18.8050172281 |
| H71  | 30.4673762608 | 48.6969965443 | 19.6512096516 |
| C72  | 31.3142966801 | 50.4930118816 | 18.7792170736 |
| H73  | 32.3005777441 | 50.9049458321 | 18.5355949886 |
| H74  | 30.8245571346 | 50.3125002980 | 17.8128556188 |
| C75  | 30.5188842004 | 51.5601351356 | 19.5420649708 |
| H76  | 30.4944036655 | 52.4760736040 | 18.9350048699 |
| H77  | 31.0204691013 | 51.8229158121 | 20.4820787150 |
| H78  | 28.6131705513 | 51.8149440739 | 20.3349734388 |
| H79  | 28.6528208161 | 50.8437756744 | 19.0324850965 |
| N80  | 29.1648498614 | 51.0836072261 | 19.8829961927 |
| O81  | 32.9442009770 | 45.7002951125 | 26.3717096757 |
| H82  | 33.0628569971 | 46.4322031301 | 27.0100409788 |
| H83  | 28.8156533985 | 49.9572880546 | 21.0976317121 |
| C84  | 33.6465628208 | 49.6913750623 | 20.7256473803 |
| H85  | 33.6418239619 | 50.7481797709 | 20.4433465334 |
| H86  | 34.1777354964 | 49.6011009769 | 21.6787895625 |
| H87  | 34.2126825806 | 49.1372838957 | 19.9689989718 |
| H88  | 31.6363414321 | 49.7519839430 | 21.5503469824 |
| H89  | 25.9233906549 | 47.6337476324 | 25.6998834336 |
| H90  | 20.2455617068 | 51.3530157746 | 22.7670922516 |
| H91  | 17.7631102901 | 51.1295548650 | 23.8247102164 |
| H92  | 15.8145964819 | 48.9346415929 | 28.2037835238 |
| H93  | 16.8563097105 | 47.4080308801 | 30.1788857560 |
| H94  | 21.4981267989 | 45.1929257526 | 31.1164865117 |
| H95  | 23.9132166919 | 45.1798172874 | 29.8964533307 |
| H96  | 20.9217799986 | 52.7624063182 | 29.5526667501 |
| O97  | 20.5205659911 | 46.6486772823 | 25.7733638506 |
| O98  | 19.1425548797 | 46.2548893641 | 25.5578601175 |
| H99  | 20.8894694106 | 45.8828313086 | 26.2580477909 |
| H100 | 18.7124097723 | 46.7450322527 | 26.2945876009 |

HOOH complex

Triplet

|    |               |               |               |
|----|---------------|---------------|---------------|
| C1 | 21.0540755358 | 51.6572035247 | 29.3587930264 |
|----|---------------|---------------|---------------|

|     |               |               |               |
|-----|---------------|---------------|---------------|
| N2  | 22.2221099267 | 50.9636584860 | 29.6177594321 |
| C3  | 20.3712962453 | 50.9063222170 | 28.4469527868 |
| C4  | 22.2272562041 | 49.8366386862 | 28.8809547000 |
| N5  | 21.1133532493 | 49.7750499593 | 28.1590059150 |
| Fe6 | 20.6389454810 | 48.3269609154 | 26.9461236392 |
| C7  | 22.0110738081 | 50.0052472304 | 24.3417667553 |
| C8  | 23.6223655546 | 46.6841966921 | 27.4727783395 |
| C9  | 19.2781549251 | 46.6959290446 | 29.6259689308 |
| C10 | 17.5725601227 | 49.7584169418 | 26.2737762149 |
| N11 | 22.4466438167 | 48.3397709933 | 26.0876311355 |
| C12 | 22.8371790894 | 49.1352212980 | 25.0330632178 |
| C13 | 24.2372817631 | 48.9062183681 | 24.7114422666 |
| C14 | 24.6647552368 | 47.9512067742 | 25.5880709746 |
| C15 | 23.5588822997 | 47.6066795465 | 26.4381146210 |
| C16 | 24.9982531108 | 49.6022929111 | 23.6199810393 |
| C17 | 26.4374116423 | 49.1052977315 | 23.4558168744 |
| C18 | 27.1912916872 | 49.8962548116 | 22.3986124222 |
| O19 | 28.2900574720 | 49.2687723830 | 21.9717085239 |
| O20 | 26.8355630979 | 50.9925055252 | 21.9962541526 |
| N21 | 21.3021447741 | 46.9277287088 | 28.2390118472 |
| C22 | 22.5665200236 | 46.3774862264 | 28.3219269037 |
| C23 | 22.6453760745 | 45.4795181391 | 29.4411980653 |
| C24 | 21.4287325615 | 45.5036362792 | 30.0547583612 |
| C25 | 20.5964372059 | 46.4070970610 | 29.3069615921 |
| N26 | 18.7837353820 | 48.1978746589 | 27.7375781024 |
| C27 | 18.4418685436 | 47.5341023755 | 28.9035689412 |
| C28 | 17.0789339372 | 47.8189752701 | 29.2519411670 |
| C29 | 16.5892256126 | 48.6673910135 | 28.3024164444 |
| C30 | 17.6528959945 | 48.9151827666 | 27.3736624794 |
| N31 | 19.9279855100 | 49.5911488642 | 25.5827017724 |
| C32 | 18.6376871424 | 50.0626622163 | 25.4398425436 |
| C33 | 18.5598161320 | 50.9689775239 | 24.3249443611 |
| C34 | 19.8119677768 | 51.0548496536 | 23.8000027127 |
| C35 | 20.6580583675 | 50.1939820795 | 24.5864129354 |
| H36 | 22.9506660551 | 51.2465064886 | 30.2595091457 |
| H37 | 19.4169206358 | 51.0920899015 | 27.9828622611 |
| H38 | 23.0175486558 | 49.1031353005 | 28.8853004285 |
| H39 | 22.4435930494 | 50.5674969547 | 23.5215363474 |
| H40 | 24.5668020754 | 46.1765365920 | 27.6407486803 |
| H41 | 18.8642332725 | 46.2218805840 | 30.5100156630 |
| H42 | 16.6168720317 | 50.2287327735 | 26.0661652030 |
| H43 | 24.4674536688 | 49.4812748552 | 22.6660767948 |
| H44 | 25.0189297934 | 50.6845059096 | 23.8002466405 |
| H45 | 26.9926989941 | 49.2089185510 | 24.3990925805 |
| H46 | 26.4719032616 | 48.0419843378 | 23.1936185805 |
| C47 | 33.6188333841 | 46.3483404237 | 25.0541867042 |

|     |               |               |               |
|-----|---------------|---------------|---------------|
| C48 | 33.6460426641 | 47.7473051172 | 24.7625276384 |
| C49 | 33.2474159364 | 48.2335974986 | 23.5268706425 |
| C50 | 32.8050317693 | 47.3355406574 | 22.5257084937 |
| H51 | 33.2758871565 | 49.2958770833 | 23.3242582764 |
| C52 | 33.1763097651 | 45.4143534474 | 24.0729855323 |
| C53 | 32.7678779629 | 45.8973601589 | 22.8075092392 |
| N54 | 32.3416692732 | 45.0946676395 | 21.8180438900 |
| C55 | 32.3042913868 | 43.7859230624 | 22.0440548701 |
| C56 | 32.6896803931 | 43.2018027603 | 23.2680411147 |
| C57 | 33.1296098067 | 44.0173760886 | 24.2919800689 |
| H58 | 31.9559620879 | 43.1641509289 | 21.2228235852 |
| H59 | 32.6404585086 | 42.1250607177 | 23.3926679433 |
| H60 | 33.4389971915 | 43.6099429417 | 25.2487247537 |
| N61 | 32.4059521615 | 47.7012608948 | 21.3079239815 |
| H62 | 32.1342978211 | 46.9078205866 | 20.7232732872 |
| O63 | 34.0911793493 | 48.4767985791 | 25.8018570554 |
| C64 | 34.2256519447 | 49.9018096241 | 25.6722671588 |
| H65 | 34.6135154579 | 50.2465478984 | 26.6300563224 |
| H66 | 34.9329035035 | 50.1460055512 | 24.8731522128 |
| H67 | 33.2507156012 | 50.3602137730 | 25.4767500032 |
| C68 | 32.3835678431 | 49.0457836257 | 20.7037871106 |
| C69 | 31.3799113877 | 48.9926952969 | 19.5338535234 |
| H70 | 31.7488013488 | 48.2553250894 | 18.8066045029 |
| H71 | 30.4236236442 | 48.6153868067 | 19.9153290280 |
| C72 | 31.1498808181 | 50.3227858441 | 18.7955684289 |
| H73 | 32.0983758001 | 50.7185313804 | 18.4142115878 |
| H74 | 30.5443116873 | 50.1067195512 | 17.9051124810 |
| C75 | 30.4511692211 | 51.4245189639 | 19.6035090496 |
| H76 | 30.4154698215 | 52.3358054605 | 18.9896460830 |
| H77 | 31.0274799053 | 51.6772304333 | 20.5025738530 |
| H78 | 28.6197922008 | 51.7492884652 | 20.5345434895 |
| H79 | 28.5263968204 | 50.7922222893 | 19.2288831084 |
| N80 | 29.1084182911 | 50.9997570129 | 20.0421408860 |
| O81 | 34.0084645037 | 45.9036019621 | 26.2461127106 |
| H82 | 34.2974625982 | 46.6626584493 | 26.7918782040 |
| H83 | 28.7083408216 | 49.8512609136 | 21.2459371711 |
| C84 | 33.8030689841 | 49.4576246868 | 20.2783801547 |
| H85 | 33.8107205361 | 50.4903208596 | 19.9179880037 |
| H86 | 34.5073406816 | 49.3893207411 | 21.1138964528 |
| H87 | 34.1687571113 | 48.8108412341 | 19.4735050275 |
| H88 | 32.0111423341 | 49.7340071097 | 21.4724465445 |
| H89 | 25.6461423787 | 47.5014505458 | 25.6619788486 |
| H90 | 20.1475312199 | 51.6378234396 | 22.9524632309 |
| H91 | 17.6562358245 | 51.4683349278 | 23.9999090650 |
| H92 | 15.5976513581 | 49.0948031956 | 28.2315213411 |
| H93 | 16.5669833145 | 47.4118004618 | 30.1140410798 |

|      |               |               |               |
|------|---------------|---------------|---------------|
| H94  | 21.1081339202 | 44.9579985316 | 30.9331443957 |
| H95  | 23.5248624300 | 44.9117508046 | 29.7165824566 |
| H96  | 20.8219671361 | 52.5968731233 | 29.8351949242 |
| O97  | 20.2166546498 | 46.7581352734 | 25.6706657476 |
| O98  | 18.8248090319 | 46.4170441467 | 25.4534988413 |
| H99  | 20.5683261793 | 45.9535254034 | 26.1024317723 |
| H100 | 18.4187055097 | 46.8835209604 | 26.2189113925 |

HOOH complex

Quintet

|     |               |               |               |
|-----|---------------|---------------|---------------|
| C1  | 20.3911082070 | 52.2734179417 | 29.0865096212 |
| N2  | 20.6756283188 | 51.4154709906 | 30.1310832217 |
| C3  | 20.2824186975 | 51.4808486972 | 27.9791262601 |
| C4  | 20.7317927022 | 50.1567269247 | 29.6473941126 |
| N5  | 20.4969668126 | 50.1628687859 | 28.3409669774 |
| Fe6 | 20.4055421950 | 48.4455607439 | 27.0530438146 |
| C7  | 21.9196212860 | 49.8753257512 | 24.3419508090 |
| C8  | 23.4520314606 | 47.2427920089 | 28.1277699710 |
| C9  | 18.8343926364 | 46.6309999338 | 29.5579922539 |
| C10 | 17.3104128177 | 49.3839359826 | 25.8415549440 |
| N11 | 22.3289446308 | 48.5380962072 | 26.3610011168 |
| C12 | 22.7563315051 | 49.2157974250 | 25.2385217489 |
| C13 | 24.2063808731 | 49.1367290621 | 25.1367459005 |
| C14 | 24.6163012113 | 48.3968898398 | 26.2149239041 |
| C15 | 23.4513036068 | 48.0223601877 | 26.9718615440 |
| C16 | 25.0296559455 | 49.7737108572 | 24.0538894261 |
| C17 | 26.5112478321 | 49.3830745713 | 24.0691769401 |
| C18 | 27.3034294765 | 50.1453142857 | 23.0176251009 |
| O19 | 28.4912054168 | 49.5887822421 | 22.7608226458 |
| O20 | 26.9047522737 | 51.1662134692 | 22.4811637879 |
| N21 | 21.0258369434 | 47.1471537715 | 28.5464040167 |
| C22 | 22.3319736642 | 46.8287736861 | 28.8552008852 |
| C23 | 22.3549589457 | 45.9995141071 | 30.0312892739 |
| C24 | 21.0568742502 | 45.8209193392 | 30.4255807757 |
| C25 | 20.2259664777 | 46.5389463105 | 29.4952020345 |
| N26 | 18.4252742387 | 47.9940927287 | 27.5440263949 |
| C27 | 18.0015632885 | 47.3271774045 | 28.6796259237 |
| C28 | 16.5795471032 | 47.4827442312 | 28.8211963884 |
| C29 | 16.1516411177 | 48.2638330073 | 27.7819620200 |
| C30 | 17.3063555638 | 48.5923647677 | 26.9923530492 |
| N31 | 19.7381243168 | 49.4471238893 | 25.4112600694 |
| C32 | 18.4278731002 | 49.7543315384 | 25.0948094126 |
| C33 | 18.3998998802 | 50.5117997946 | 23.8721018581 |
| C34 | 19.6936277331 | 50.6426835848 | 23.4483657900 |
| C35 | 20.5273609059 | 49.9716807828 | 24.4096134732 |
| H36 | 20.8137428435 | 51.6810111191 | 31.0972332894 |

|     |               |               |               |
|-----|---------------|---------------|---------------|
| H37 | 20.0661667244 | 51.7566526207 | 26.9591528138 |
| H38 | 20.9353504573 | 49.2838529055 | 30.2478436816 |
| H39 | 22.3911109277 | 50.3605701901 | 23.4936855992 |
| H40 | 24.4187780712 | 46.9064128552 | 28.4903854401 |
| H41 | 18.3502706750 | 46.1225282077 | 30.3861323595 |
| H42 | 16.3467387709 | 49.7391670359 | 25.4892556726 |
| H43 | 24.6053296932 | 49.5205208648 | 23.0735567407 |
| H44 | 24.9573873793 | 50.8669711376 | 24.1215767512 |
| H45 | 26.9648466975 | 49.6124944089 | 25.0437398895 |
| H46 | 26.6504115517 | 48.3076980659 | 23.9112164417 |
| C47 | 34.6282005503 | 46.0137485023 | 24.4016718654 |
| C48 | 34.7712769912 | 47.4029522719 | 24.0952116271 |
| C49 | 34.1080748249 | 47.9751539051 | 23.0200085429 |
| C50 | 33.2717735902 | 47.1774756207 | 22.2026636539 |
| H51 | 34.2308352662 | 49.0276876955 | 22.8020127957 |
| C52 | 33.7964048588 | 45.1788607635 | 23.5999405345 |
| C53 | 33.1160039755 | 45.7503187623 | 22.4992661611 |
| N54 | 32.3160379830 | 45.0435888354 | 21.6832259545 |
| C55 | 32.1607600961 | 43.7466020078 | 21.9260814594 |
| C56 | 32.7918217460 | 43.0798241501 | 22.9958629610 |
| C57 | 33.6159118570 | 43.7966285228 | 23.8411339926 |
| H58 | 31.5095372797 | 43.2028497636 | 21.2459055894 |
| H59 | 32.6280144038 | 42.0173775356 | 23.1429831726 |
| H60 | 34.1232848329 | 43.3230462588 | 24.6749581543 |
| N61 | 32.5883443046 | 47.6300974551 | 21.1515167382 |
| H62 | 32.0533359754 | 46.8973104035 | 20.6803503368 |
| O63 | 35.5963649243 | 48.0321236831 | 24.9510942479 |
| C64 | 35.8839834274 | 49.4293805463 | 24.7747804636 |
| H65 | 36.5737574412 | 49.6884726915 | 25.5770298879 |
| H66 | 36.3595035313 | 49.5996916778 | 23.8035410882 |
| H67 | 34.9669856767 | 50.0207711491 | 24.8643787084 |
| C68 | 32.5642511169 | 48.9838490040 | 20.5706125918 |
| C69 | 31.2362654939 | 49.1111148941 | 19.7942894885 |
| H70 | 31.2428602757 | 48.3573557335 | 18.9939294347 |
| H71 | 30.4117920645 | 48.8530412420 | 20.4699642995 |
| C72 | 30.9671445051 | 50.4874552588 | 19.1620452783 |
| H73 | 31.8102512089 | 50.7896285624 | 18.5300347747 |
| H74 | 30.1144789267 | 50.3796718622 | 18.4782090510 |
| C75 | 30.6592851986 | 51.6258423624 | 20.1440426873 |
| H76 | 30.6132179307 | 52.5671582026 | 19.5776639261 |
| H77 | 31.4680507641 | 51.7422678902 | 20.8766315720 |
| H78 | 29.1722187781 | 52.1734924146 | 21.4766731164 |
| H79 | 28.6251386612 | 51.2950912117 | 20.2452242316 |
| N80 | 29.4118625083 | 51.3722988723 | 20.8921023189 |
| O81 | 35.2724653560 | 45.4851684795 | 25.4381190326 |
| H82 | 35.8055662799 | 46.1809926301 | 25.8732207431 |

|      |               |               |               |
|------|---------------|---------------|---------------|
| H83  | 28.9549026588 | 50.1748698457 | 22.0719450480 |
| C84  | 33.8142061800 | 49.2052997055 | 19.7020806253 |
| H85  | 33.8547279622 | 50.2371766232 | 19.3417223052 |
| H86  | 34.7314515206 | 49.0122025994 | 20.2681185105 |
| H87  | 33.8053764408 | 48.5382871670 | 18.8331786924 |
| H88  | 32.5658721881 | 49.6913091862 | 21.4086802300 |
| H89  | 25.6279196792 | 48.1167058472 | 26.4780758675 |
| H90  | 20.0533877458 | 51.1447484421 | 22.5597215030 |
| H91  | 17.5030942590 | 50.8852265116 | 23.3943901229 |
| H92  | 15.1424017325 | 48.5923674258 | 27.5703000497 |
| H93  | 15.9843081437 | 47.0541292022 | 29.6174259952 |
| H94  | 20.6915415583 | 45.2499383888 | 31.2694016838 |
| H95  | 23.2492710544 | 45.6016121236 | 30.4938131897 |
| H96  | 20.2934638741 | 53.3389813093 | 29.2250452469 |
| O97  | 20.3395578306 | 46.4862777538 | 25.7406423611 |
| O98  | 19.0268344916 | 45.8918705237 | 25.5627609902 |
| H99  | 20.7913149594 | 45.8039038716 | 26.2730436836 |
| H100 | 18.5110295077 | 46.4532140165 | 26.1820550368 |

#### HOOH complex

##### Septet

|     |               |               |               |
|-----|---------------|---------------|---------------|
| C1  | 20.5359742539 | 52.1822516531 | 29.3253609408 |
| N2  | 21.1152170782 | 51.3006628927 | 30.2172889958 |
| C3  | 20.2323869291 | 51.4398622562 | 28.2194891871 |
| C4  | 21.1467161371 | 50.0766842975 | 29.6490657519 |
| N5  | 20.6178614946 | 50.1285368925 | 28.4328801047 |
| Fe6 | 20.3694043551 | 48.4765769279 | 27.0814886323 |
| C7  | 21.8924117178 | 49.9214262823 | 24.3859495756 |
| C8  | 23.3590854085 | 47.0197957883 | 27.9970850057 |
| C9  | 18.7629239904 | 46.6977668607 | 29.5835662283 |
| C10 | 17.3042276482 | 49.6579516063 | 26.0027827778 |
| N11 | 22.2726737532 | 48.4688389673 | 26.3296119480 |
| C12 | 22.7100326091 | 49.1698643700 | 25.2255204323 |
| C13 | 24.1470842172 | 48.9982327898 | 25.0694568462 |
| C14 | 24.5387306729 | 48.1791588148 | 26.0957566987 |
| C15 | 23.3750837475 | 47.8484533910 | 26.8756761218 |
| C16 | 24.9759857732 | 49.6292094536 | 23.9872679263 |
| C17 | 26.4298102057 | 49.1455942176 | 23.9353680369 |
| C18 | 27.2329894613 | 49.9048395911 | 22.8896581811 |
| O19 | 28.3132159077 | 49.2348759069 | 22.4797284934 |
| O20 | 26.9271356512 | 51.0150259911 | 22.4837735542 |
| N21 | 20.9488779614 | 47.0839972970 | 28.5041342378 |
| C22 | 22.2376871479 | 46.6586138836 | 28.7510213118 |
| C23 | 22.2404489454 | 45.7910884805 | 29.8999443049 |
| C24 | 20.9480453754 | 45.6985874218 | 30.3403682168 |
| C25 | 20.1406841016 | 46.5076129050 | 29.4658058582 |

|     |               |               |               |
|-----|---------------|---------------|---------------|
| N26 | 18.3793942149 | 48.1475094255 | 27.6255682540 |
| C27 | 17.9506248796 | 47.4754347215 | 28.7558815163 |
| C28 | 16.5470462396 | 47.7171767781 | 28.9504890450 |
| C29 | 16.1366589958 | 48.5534796379 | 27.9477979591 |
| C30 | 17.2841946054 | 48.8314879568 | 27.1288383742 |
| N31 | 19.7180231145 | 49.5844921991 | 25.5015588015 |
| C32 | 18.4214162193 | 49.9837330329 | 25.2350157279 |
| C33 | 18.4083298042 | 50.7903401995 | 24.0436099570 |
| C34 | 19.6964793332 | 50.8603341827 | 23.5895521392 |
| C35 | 20.5116645519 | 50.1015260335 | 24.4998557232 |
| H36 | 21.4522699027 | 51.5283029150 | 31.1432870147 |
| H37 | 19.7683895579 | 51.7475380298 | 27.2957890324 |
| H38 | 21.5445193201 | 49.1950229296 | 30.1269170571 |
| H39 | 22.3697609331 | 50.4131076730 | 23.5446907680 |
| H40 | 24.3108604224 | 46.6004302077 | 28.3094393286 |
| H41 | 18.2728206110 | 46.1989933252 | 30.4140794777 |
| H42 | 16.3553806129 | 50.0849516775 | 25.6923750899 |
| H43 | 24.5056129952 | 49.4437496695 | 23.0125320207 |
| H44 | 24.9775714011 | 50.7208529408 | 24.1018693927 |
| H45 | 26.9248476149 | 49.3067122204 | 24.9036500103 |
| H46 | 26.4947602931 | 48.0722305603 | 23.7276579646 |
| C47 | 34.6128534489 | 46.1296364690 | 24.5153448947 |
| C48 | 34.6639776603 | 47.5323136750 | 24.2435361990 |
| C49 | 34.0670339953 | 48.0687894976 | 23.1127446345 |
| C50 | 33.3922154846 | 47.2203077700 | 22.2024898796 |
| H51 | 34.1189476467 | 49.1324631790 | 22.9221545083 |
| C52 | 33.9443931823 | 45.2441064118 | 23.6205468788 |
| C53 | 33.3332500762 | 45.7788908272 | 22.4622565382 |
| N54 | 32.6853566276 | 45.0246242572 | 21.5587659601 |
| C55 | 32.6193089691 | 43.7142304063 | 21.7676533995 |
| C56 | 33.1928758642 | 43.0807217173 | 22.8888866045 |
| C57 | 33.8607675011 | 43.8466240271 | 23.8241876298 |
| H58 | 32.0905175930 | 43.1319712336 | 21.0168486737 |
| H59 | 33.1071841331 | 42.0053425161 | 23.0050278904 |
| H60 | 34.3188110153 | 43.4000876590 | 24.7003983792 |
| N61 | 32.7809345716 | 47.6368589414 | 21.0936270737 |
| H62 | 32.3634901103 | 46.8722701683 | 20.5585358644 |
| O63 | 35.3372499166 | 48.2120242612 | 25.1892320433 |
| C64 | 35.5178714271 | 49.6320673918 | 25.0596303283 |
| H65 | 36.0952219746 | 49.9335096317 | 25.9327624634 |
| H66 | 36.0746562499 | 49.8622788119 | 24.1456087414 |
| H67 | 34.5482682411 | 50.1406236198 | 25.0587683858 |
| C68 | 32.6887598624 | 48.9990539046 | 20.5394998075 |
| C69 | 31.4382953326 | 49.0286329803 | 19.6353691981 |
| H70 | 31.6042224618 | 48.3196584896 | 18.8118036267 |
| H71 | 30.5824267341 | 48.6559152197 | 20.2111788454 |

|      |               |               |               |
|------|---------------|---------------|---------------|
| C72  | 31.0864240724 | 50.4011610501 | 19.0362337041 |
| H73  | 31.9598891342 | 50.8375396918 | 18.5379728076 |
| H74  | 30.3485761154 | 50.2387046434 | 18.2389614054 |
| C75  | 30.5159182689 | 51.4328241665 | 20.0192097094 |
| H76  | 30.4322460240 | 52.3963130715 | 19.4960435439 |
| H77  | 31.2004944735 | 51.5942789084 | 20.8617558366 |
| H78  | 28.7930076877 | 51.7319419582 | 21.1375438877 |
| H79  | 28.5566739042 | 50.8410957083 | 19.8120459507 |
| N80  | 29.2197257257 | 50.9944993916 | 20.5740453058 |
| O81  | 35.1910776806 | 45.6360115614 | 25.6066839190 |
| H82  | 35.6144111197 | 46.3655318314 | 26.1029058108 |
| H83  | 28.7776269963 | 49.8003654003 | 21.7755721156 |
| C84  | 33.9922050102 | 49.3579690391 | 19.8059801811 |
| H85  | 33.9693968278 | 50.3975265655 | 19.4667589354 |
| H86  | 34.8628541604 | 49.2381256208 | 20.4591097755 |
| H87  | 34.1338358280 | 48.7143566386 | 18.9309890884 |
| H88  | 32.5421533411 | 49.6789628189 | 21.3873665621 |
| H89  | 25.5360579885 | 47.8168724967 | 26.3084733406 |
| H90  | 20.0636835923 | 51.3759542348 | 22.7117869879 |
| H91  | 17.5240938036 | 51.2360185308 | 23.6060546270 |
| H92  | 15.1442666935 | 48.9511657309 | 27.7795059764 |
| H93  | 15.9515252082 | 47.3043259303 | 29.7547794650 |
| H94  | 20.5719848132 | 45.1292346081 | 31.1810041964 |
| H95  | 23.1180105558 | 45.3109374537 | 30.3140403400 |
| H96  | 20.3961991083 | 53.2272205427 | 29.5548235912 |
| O97  | 20.1172263921 | 46.5813039285 | 25.7055965311 |
| O98  | 18.7530547308 | 46.1293048259 | 25.5043870940 |
| H99  | 20.5016659433 | 45.8330180780 | 26.2010669304 |
| H100 | 18.2977256062 | 46.6841136937 | 26.1749368431 |
